# Supplementary material
Source: PubMed Central journal article supplement (PMC2836669)

## PAS FAD1 containing methyl-accepting chemotaxis proteins

| Organism                                                              | GI        | Domain architecture         |
|-----------------------------------------------------------------------|-----------|-----------------------------|
| <i>Acidovorax citrullii</i> AAC00-1                                   | 120612562 | PAS FAD1 - HAMP - MCPsignal |
| <i>Azoarcus</i> sp. BH72                                              | 119897661 | PAS FAD1 - HAMP - MCPsignal |
| <i>Burkholderia</i> sp. H160                                          | 209515519 | PAS FAD1 - HAMP - MCPsignal |
| <i>Burkholderia graminis</i> C4D1M                                    | 170692196 | PAS FAD1 - HAMP - MCPsignal |
| <i>Colwellia psychrerythraea</i> 34H                                  | 71279028  | PAS FAD1 - HAMP - MCPsignal |
| <i>Moritella</i> sp. PE36                                             | 149908222 | PAS FAD1 - HAMP - MCPsignal |
| <i>Marinobacter algicola</i> DG893                                    | 149375527 | PAS FAD1 - HAMP - MCPsignal |
| <i>Methylibium petroleiphilum</i> PM1                                 | 124267965 | PAS FAD1 - HAMP - MCPsignal |
| <i>Thiomicrospira crunogena</i> XCL-2                                 | 78486236  | PAS FAD1 - HAMP - MCPsignal |
| <i>Leptospira interrogans</i> serovar Lai str. 56601                  | 24212749  | PAS FAD1 - MCPsignal        |
| <i>Leptospira interrogans</i> serovar Copenhageni str. Fiocruz L1-130 | 45655957  | PAS FAD1 - MCPsignal        |
| <i>Leptospira borgpetersenii</i> serovar Hardjo-bovis JB197           | 116329831 | PAS FAD1 - MCPsignal        |
| <i>Leptospira borgpetersenii</i> serovar Hardjo-bovis L550            | 116329516 | PAS FAD1 - MCPsignal        |
| <i>Marinomonas</i> sp. MED121                                         | 87120253  | PAS FAD1 - MCPsignal        |
| <i>Marinomonas</i> sp. MED121                                         | 87119503  | PAS FAD1 - MCPsignal        |
| <i>Marinomonas</i> sp. MWYL1                                          | 152997463 | PAS FAD1 - MCPsignal        |
| <i>Vibrio cholerae</i> 1587                                           | 153212224 | PAS FAD1 - MCPsignal        |
| <i>Vibrio cholerae</i> 623-39                                         | 153827851 | PAS FAD1 - MCPsignal        |
| <i>Vibrio cholerae</i> V51                                            | 116221838 | PAS FAD1 - MCPsignal        |
| <i>Vibrio cholerae</i> TMA 21                                         | 229514396 | PAS FAD1 - MCPsignal        |
| <i>Vibrio cholerae</i> 2740-80                                        | 121587001 | PAS FAD1 - MCPsignal        |
| <i>Vibrio cholerae</i> RC385                                          | 116218088 | PAS FAD1 - MCPsignal        |
| <i>Vibrio vulnificus</i> CMCP6                                        | 27366531  | PAS FAD1 - MCPsignal        |
| <i>Vibrio vulnificus</i> YJ016                                        | 37676239  | PAS FAD1 - MCPsignal        |
| <i>Marinomonas</i> sp. MED121                                         | 87118448  | PAS FAD1 - MCPsignal        |
| <i>Vibrio fischeri</i> ES114                                          | 59713275  | PAS FAD1 - MCPsignal        |
| <i>Vibrio fischeri</i> MJ11                                           | 197337320 | PAS FAD1 - MCPsignal        |
| <i>Shewanella pealeana</i> ATCC 700345                                | 157960166 | PAS FAD1 - MCPsignal        |
| <i>Shewanella halifaxensis</i> HAW-EB4                                | 167625858 | PAS FAD1 - MCPsignal        |
| <i>Vibrio</i> sp. Ex25                                                | 116183844 | PAS FAD1 - MCPsignal        |
| <i>Vibrio parahaemolyticus</i> RIMD 2210633                           | 28900451  | PAS FAD1 - MCPsignal        |

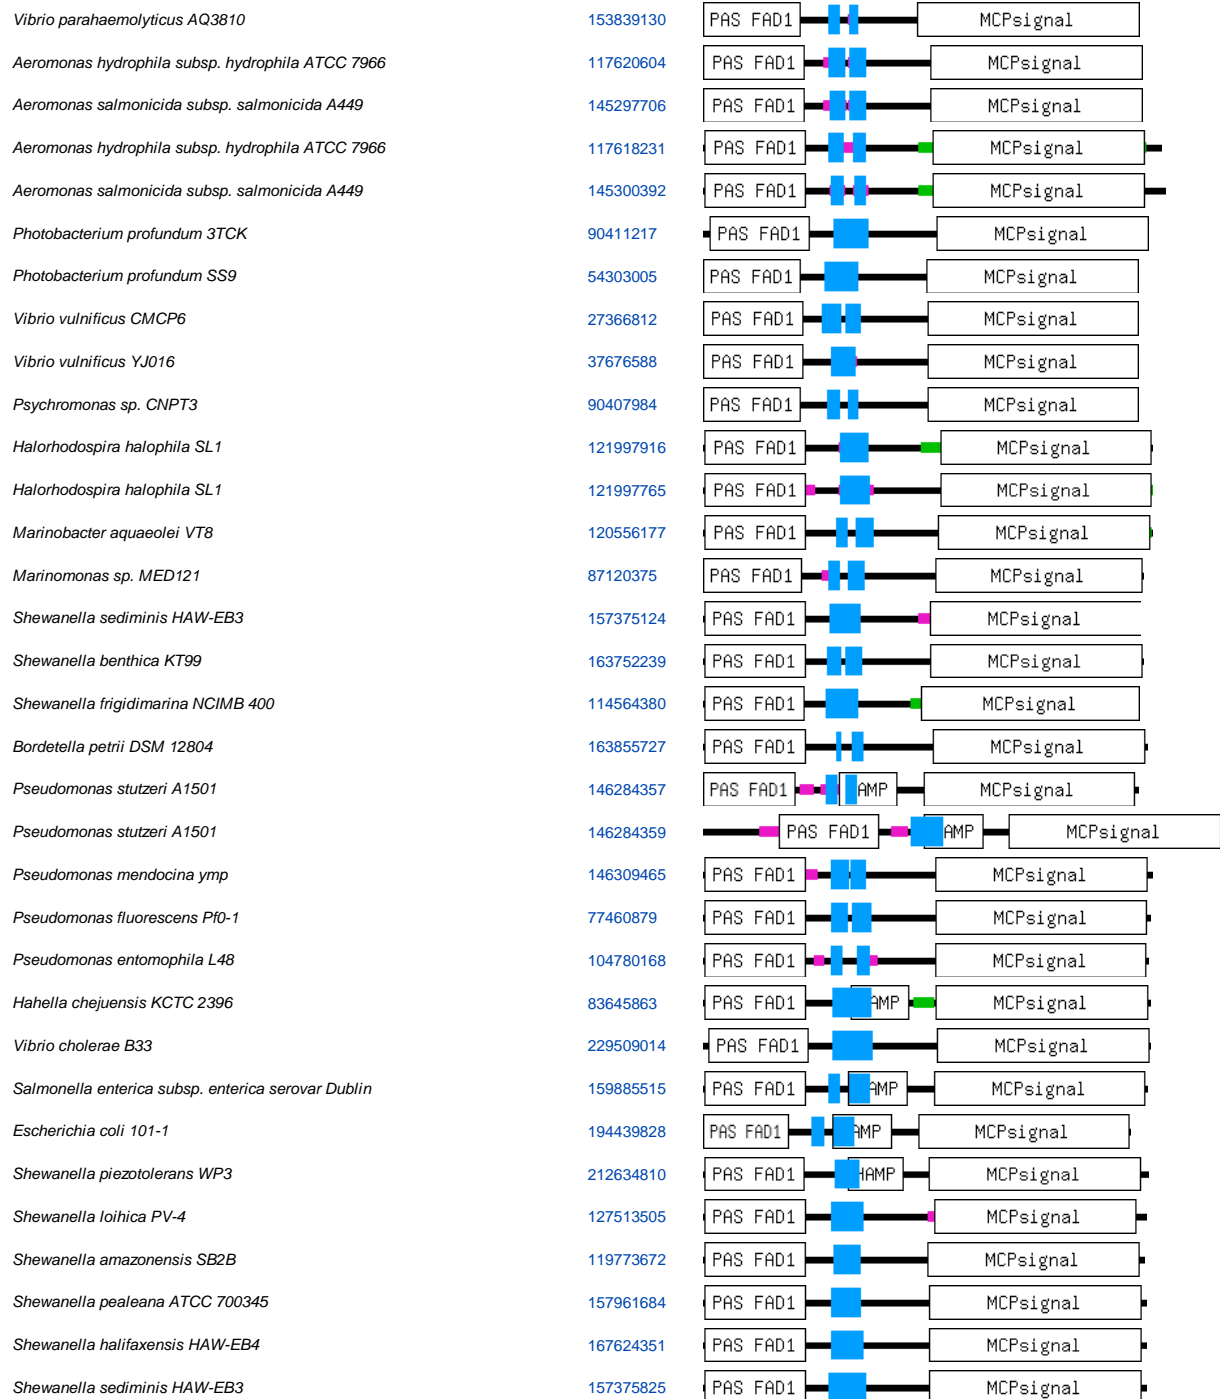

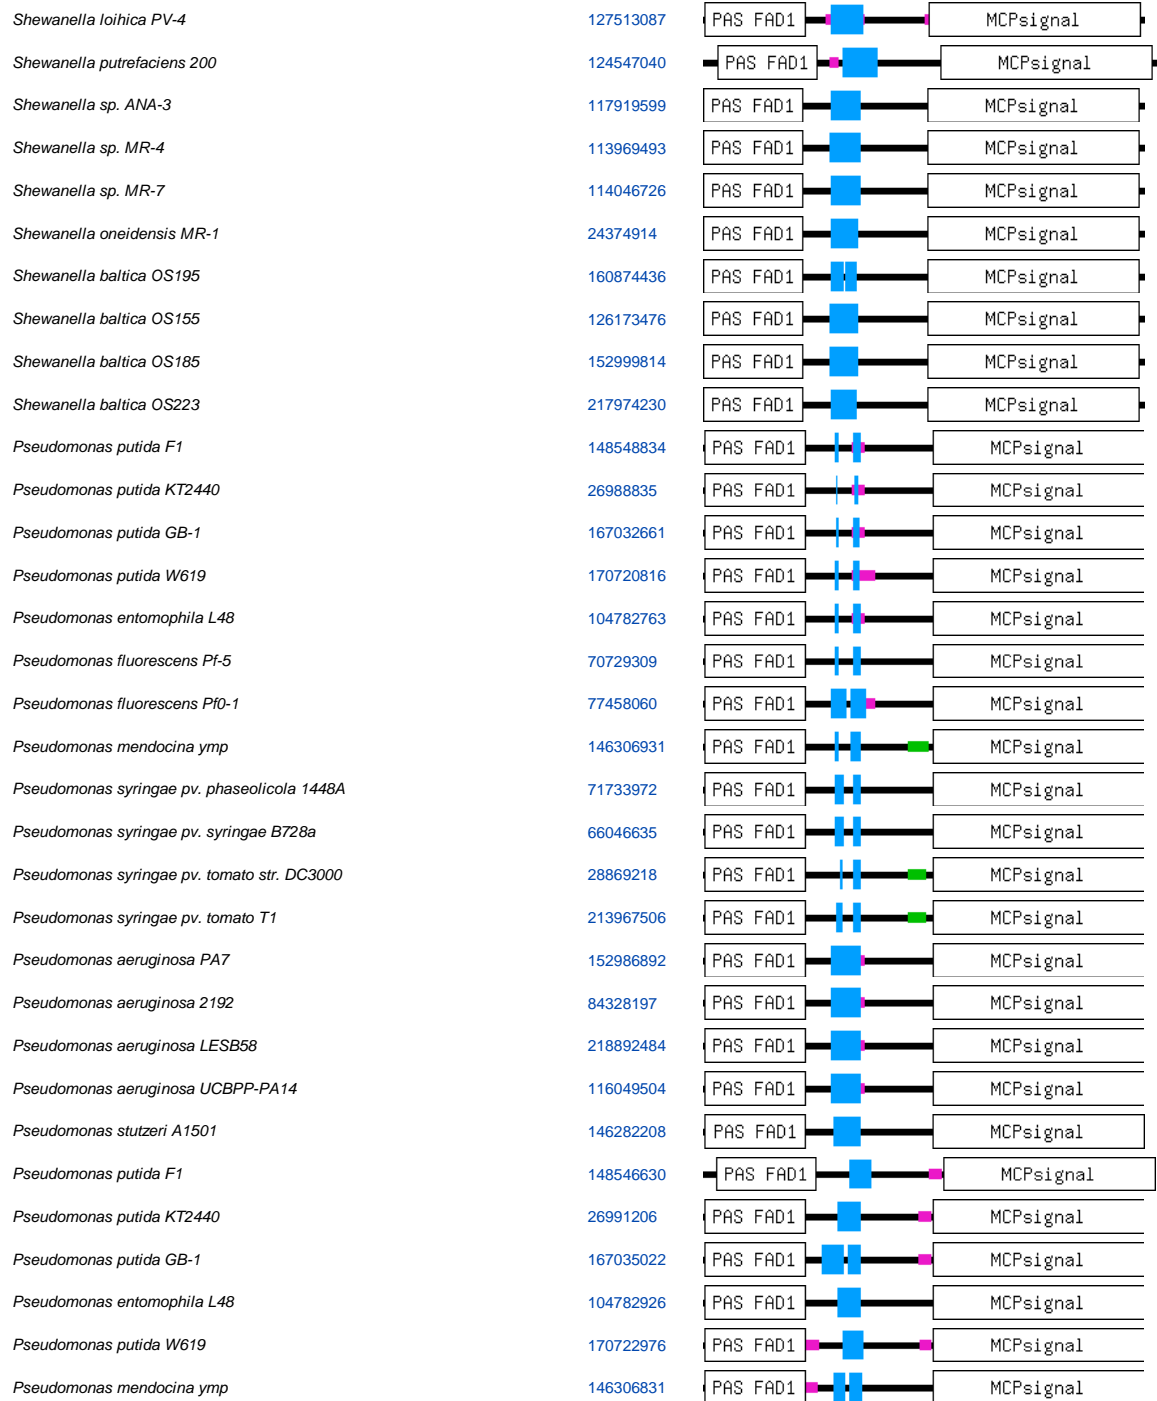

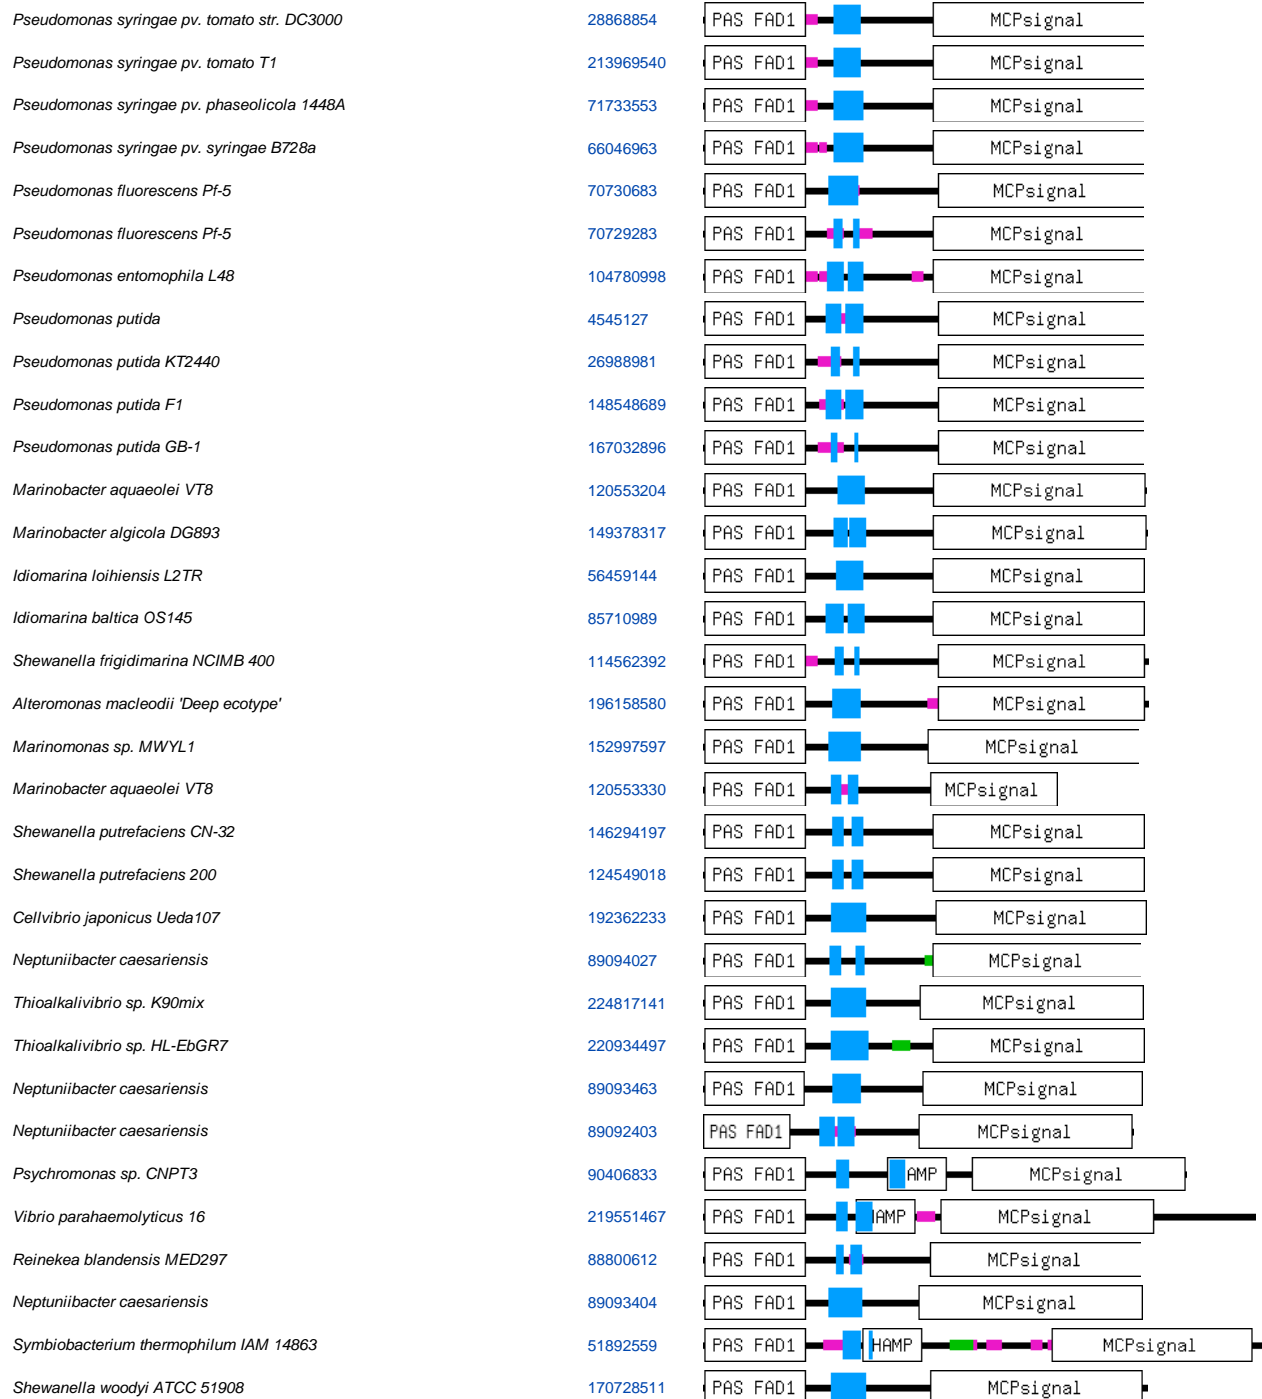

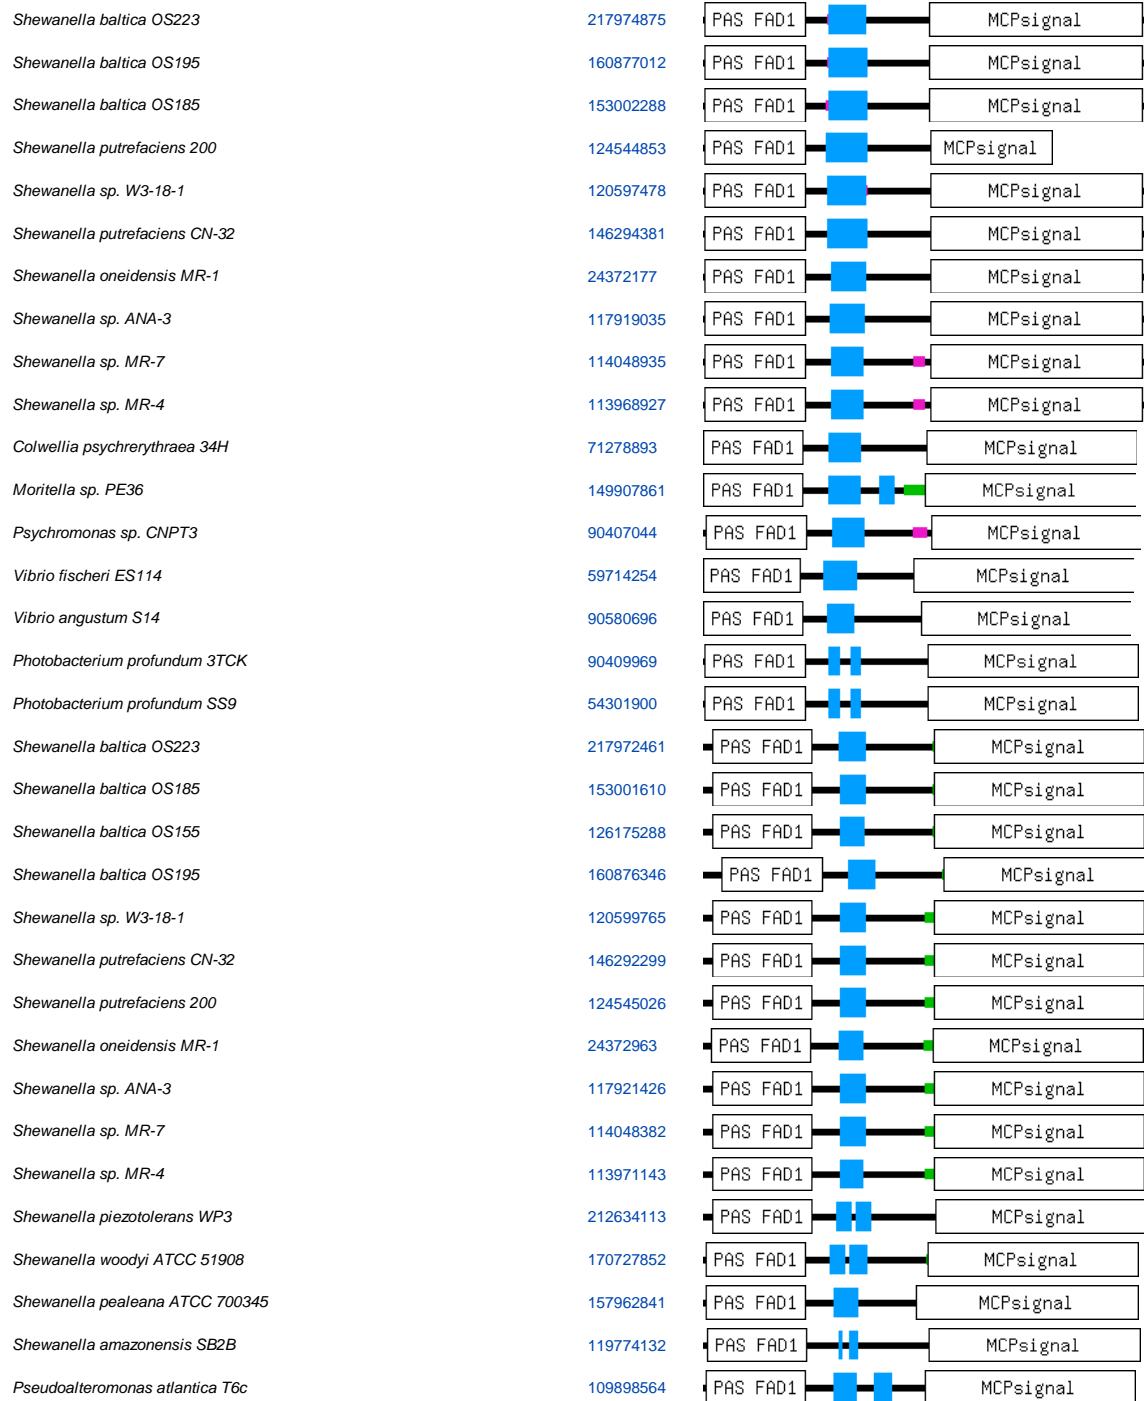

|                                                                |           |          |  |           |
|----------------------------------------------------------------|-----------|----------|--|-----------|
| <i>Aeromonas hydrophila</i> subsp. <i>hydrophila</i> ATCC 7966 | 117618963 | PAS FAD1 |  | MCPsignal |
| <i>Aeromonas salmonicida</i> subsp. <i>salmonicida</i> A449    | 145299460 | PAS FAD1 |  | MCPsignal |
| <i>Aeromonas hydrophila</i> subsp. <i>hydrophila</i> ATCC 7966 | 117617725 | PAS FAD1 |  | MCPsignal |
| <i>Aeromonas salmonicida</i> subsp. <i>salmonicida</i> A449    | 145300009 | PAS FAD1 |  | MCPsignal |
| <i>Pseudoalteromonas haloplanktis</i> TAC125                   | 77359361  | PAS FAD1 |  | MCPsignal |
| <i>Pseudoalteromonas tunicata</i> D2                           | 88857473  | PAS FAD1 |  | MCPsignal |
| <i>Colwellia psychrerythraea</i> 34H                           | 71279686  | PAS FAD1 |  | MCPsignal |
| <i>Pseudoalteromonas haloplanktis</i> TAC125                   | 77359883  | PAS FAD1 |  | MCPsignal |
| <i>Alteromonadales</i> bacterium TW-7                          | 119470044 | PAS FAD1 |  | MCPsignal |
| <i>Photobacterium profundum</i> 3TCK                           | 90411120  | PAS FAD1 |  | MCPsignal |
| <i>Photobacterium profundum</i> SS9                            | 54302188  | PAS FAD1 |  | MCPsignal |
| <i>Vibrio alginolyticus</i> 12G01                              | 91224875  | PAS FAD1 |  | MCPsignal |
| <i>Vibrio</i> sp. Ex25                                         | 116187405 | PAS FAD1 |  | MCPsignal |
| <i>Vibrio parahaemolyticus</i> RIMD 2210633                    | 28901037  | PAS FAD1 |  | MCPsignal |
| <i>Vibrio harveyi</i> ATCC BAA-1116                            | 156977471 | PAS FAD1 |  | MCPsignal |
| <i>Vibrio vulnificus</i> YJ016                                 | 37676765  | PAS FAD1 |  | MCPsignal |
| <i>Vibrio vulnificus</i> CMCP6                                 | 27366987  | PAS FAD1 |  | MCPsignal |
| <i>Vibrio parahaemolyticus</i> 16                              | 219550454 | PAS FAD1 |  | MCPsignal |
| <i>Vibrio splendidus</i> 12B01                                 | 84385130  | PAS FAD1 |  | MCPsignal |
| <i>Vibrio splendidus</i> LGP32                                 | 218676816 | PAS FAD1 |  | MCPsignal |
| <i>Vibrio cholerae</i> RC385                                   | 194535348 | PAS FAD1 |  | MCPsignal |
| <i>Vibrio cholerae</i> M66-2                                   | 227812225 | PAS FAD1 |  | MCPsignal |
| <i>Vibrio cholerae</i> MZO-2                                   | 153824377 | PAS FAD1 |  | MCPsignal |
| <i>Vibrio cholerae</i> V51                                     | 194537641 | PAS FAD1 |  | MCPsignal |
| <i>Vibrio cholerae</i> MZO-3                                   | 153800901 | PAS FAD1 |  | MCPsignal |
| <i>Vibrio cholerae</i> MAK 757                                 | 153219971 | PAS FAD1 |  | MCPsignal |
| <i>Vibrio cholerae</i> 12129(1)                                | 229528511 | PAS FAD1 |  | MCPsignal |
| <i>Vibrio cholerae</i> O395                                    | 227119829 | PAS FAD1 |  | MCPsignal |
| <i>Vibrio cholerae</i> MO10                                    | 116190359 | PAS FAD1 |  | MCPsignal |
| <i>Vibrio cholerae</i> B33                                     | 229509965 | PAS FAD1 |  | MCPsignal |
| <i>Laribacter hongkongensis</i> HLHK9                          | 226939655 | PAS FAD1 |  | MCPsignal |
| <i>Lutiella nitroferum</i> 2002                                | 224824463 | PAS FAD1 |  | MCPsignal |
| <i>Lutiella nitroferum</i> 2002                                | 224827062 | PAS FAD1 |  | MCPsignal |

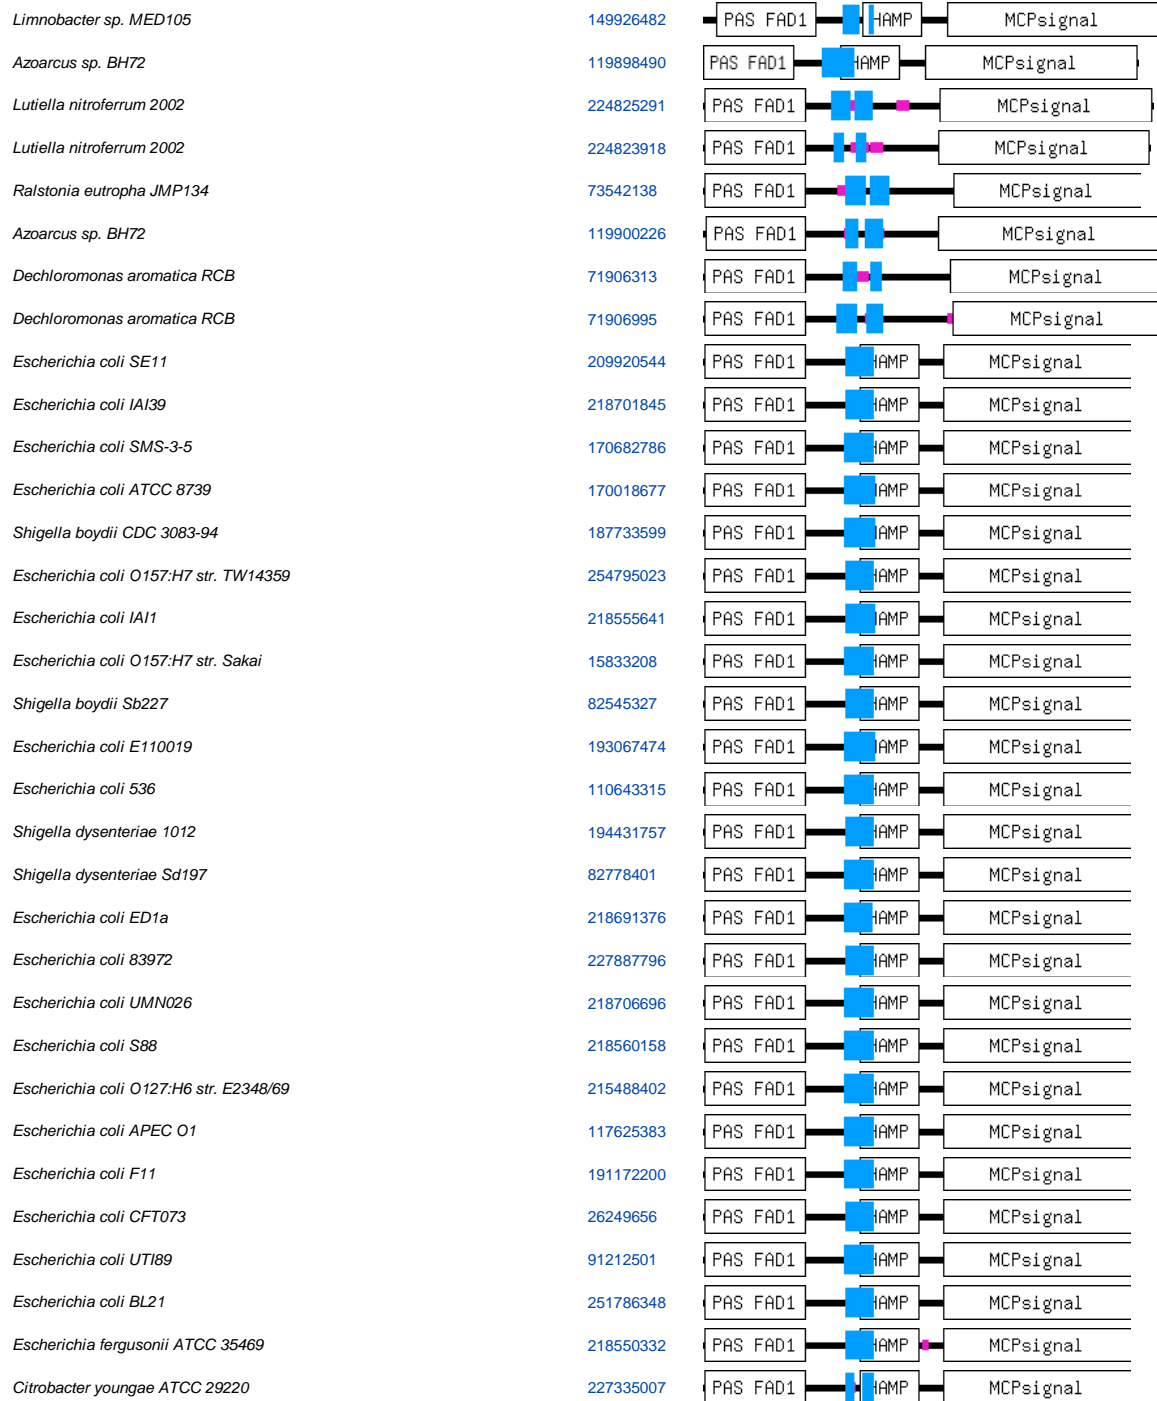

|                                                                                        |           |  |
|----------------------------------------------------------------------------------------|-----------|--|
| <i>Citrobacter</i> sp. 30_2                                                            | 226908619 |  |
| <i>Citrobacter koseri</i> ATCC BAA-895                                                 | 157148657 |  |
| <i>Salmonella enterica</i> subsp. <i>arizonae</i> serovar 62:z4,z23:--                 | 161506219 |  |
| <i>Salmonella enterica</i> subsp. <i>enterica</i> serovar Typhi str. E98-3139          | 214001002 |  |
| <i>Salmonella enterica</i> subsp. <i>enterica</i> serovar Typhi str. E00-7866          | 213053181 |  |
| <i>Salmonella enterica</i> subsp. <i>enterica</i> serovar Typhi str. J185              | 213646101 |  |
| <i>Salmonella enterica</i> subsp. <i>enterica</i> serovar Hadar str. RL_05P066         | 168262780 |  |
| <i>Salmonella enterica</i> subsp. <i>enterica</i> serovar Tennessee str. CDC07-0191    | 238910019 |  |
| <i>Salmonella enterica</i> subsp. <i>enterica</i> serovar Heidelberg str. SL486        | 168243048 |  |
| <i>Salmonella enterica</i> subsp. <i>enterica</i> serovar Schwarzengrund str. CVM19633 | 194737278 |  |
| <i>Salmonella enterica</i> subsp. <i>enterica</i> serovar Kentucky str. CVM29188       | 194471795 |  |
| <i>Salmonella enterica</i> subsp. <i>enterica</i> serovar Gallinarum str. 287/91       | 205354131 |  |
| <i>Salmonella enterica</i> subsp. <i>enterica</i> serovar Saintpaul str. SARA29        | 167553278 |  |
| <i>Salmonella enterica</i> subsp. <i>enterica</i> serovar Paratyphi B str. SPB7        | 161616210 |  |
| <i>Salmonella enterica</i> subsp. <i>enterica</i> serovar Javiana str. GA_MM04042433   | 204927997 |  |
| <i>Salmonella enterica</i> subsp. <i>enterica</i> serovar Paratyphi C strain RKS4594   | 224585019 |  |
| <i>Salmonella enterica</i> subsp. <i>enterica</i> serovar Virchow str. SL491           | 200388320 |  |
| <i>Enterobacter</i> sp. 638                                                            | 146313162 |  |
| <i>Enterobacter cancerogenus</i> ATCC 35316                                            | 209910113 |  |
| <i>Oryza sativa</i> Indica Group                                                       | 218185801 |  |
| <i>Cronobacter sakazakii</i> ATCC BAA-894                                              | 156935624 |  |
| <i>Providencia stuartii</i> ATCC 25827                                                 | 183597876 |  |
| <i>Providencia rettgeri</i> DSM 1131                                                   | 223991569 |  |
| <i>Providencia rustigianii</i> DSM 4541                                                | 212706173 |  |
| <i>Providencia alcalifaciens</i> DSM 30120                                             | 212711172 |  |
| <i>Pectobacterium carotovorum</i> subsp. <i>carotovorum</i> WPP14                      | 227326377 |  |
| <i>Pectobacterium carotovorum</i> subsp. <i>brasiliensis</i> PBR1692                   | 227111876 |  |
| <i>Pectobacterium atrosepticum</i> SCRI1043                                            | 50120929  |  |
| <i>Pectobacterium carotovorum</i> subsp. <i>brasiliensis</i> PBR1692                   | 227111875 |  |
| <i>Pectobacterium atrosepticum</i> SCRI1043                                            | 50120928  |  |
| <i>Pectobacterium carotovorum</i> subsp. <i>carotovorum</i> WPP14                      | 227326376 |  |
| <i>Proteus mirabilis</i> HI4320                                                        | 197286642 |  |
| <i>Proteus mirabilis</i> ATCC 29906                                                    | 227355167 |  |



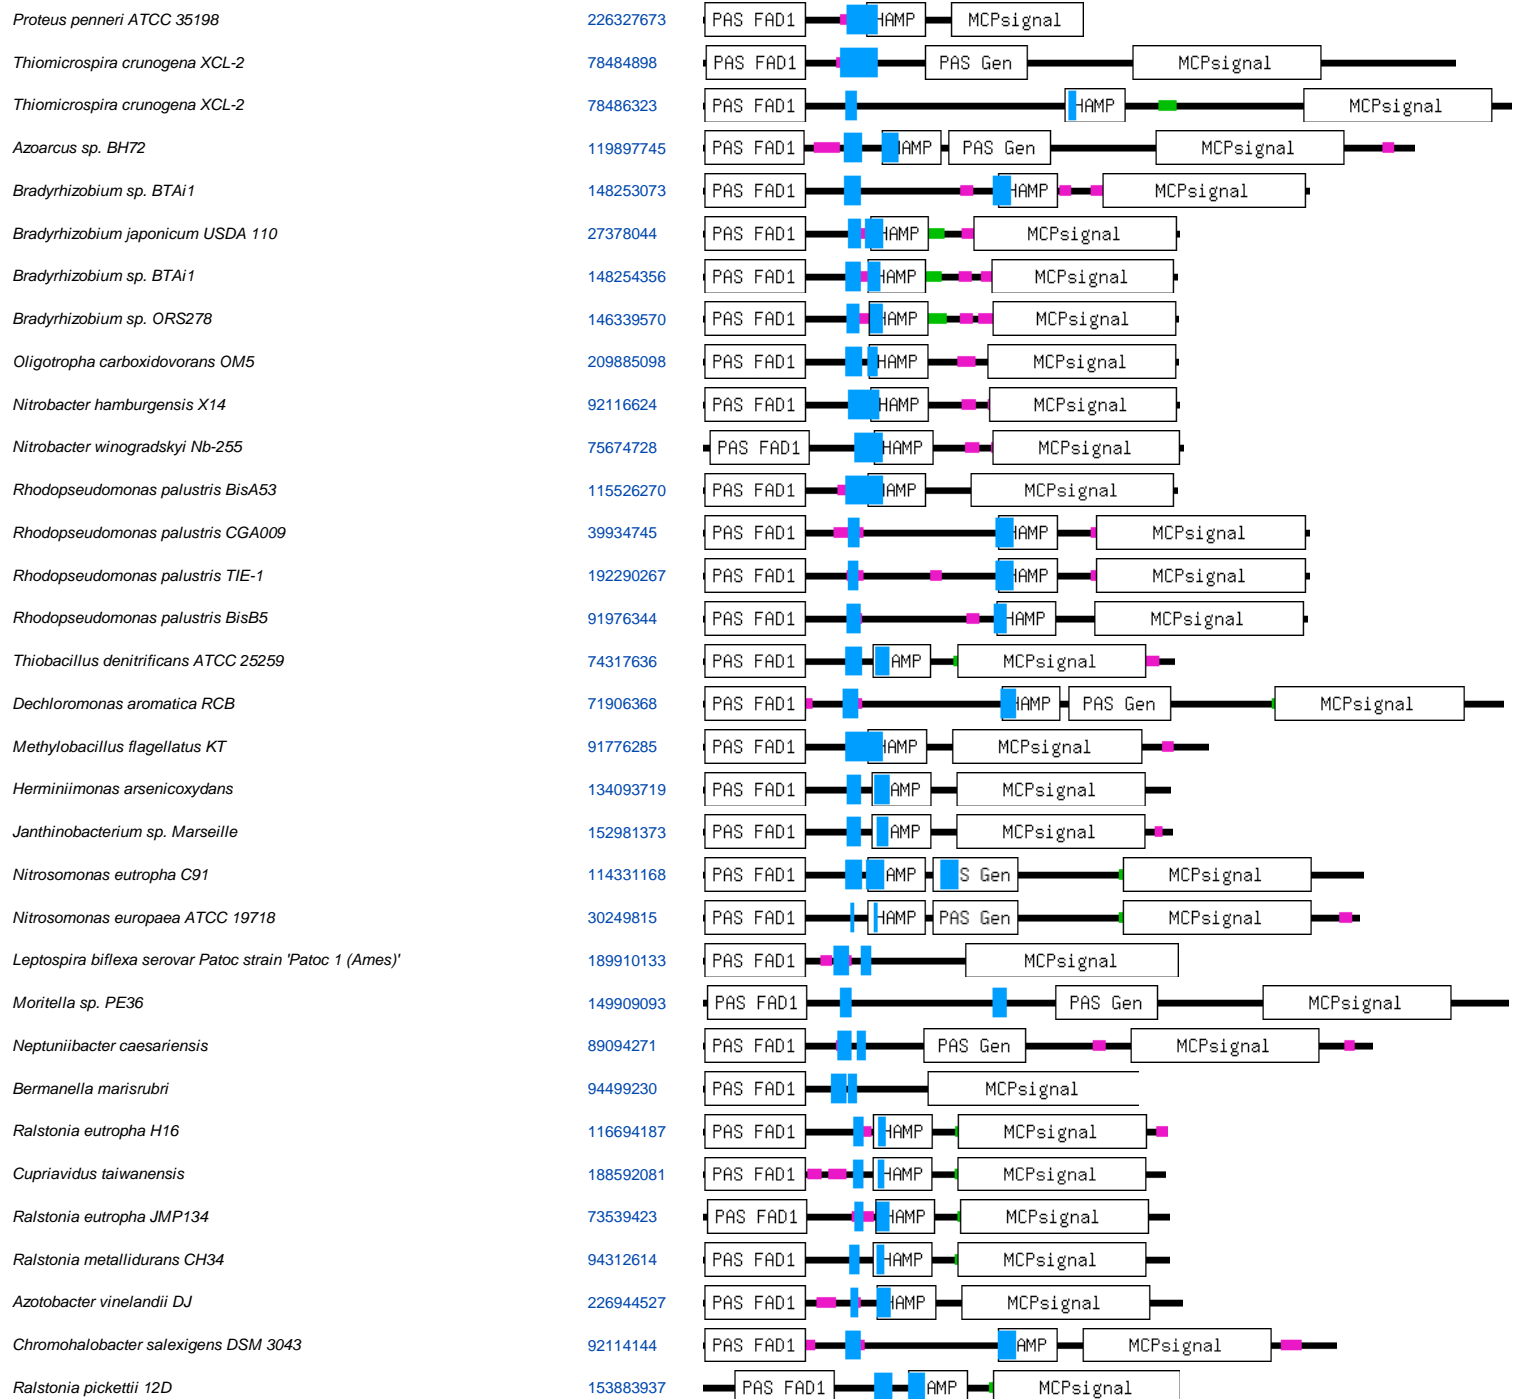

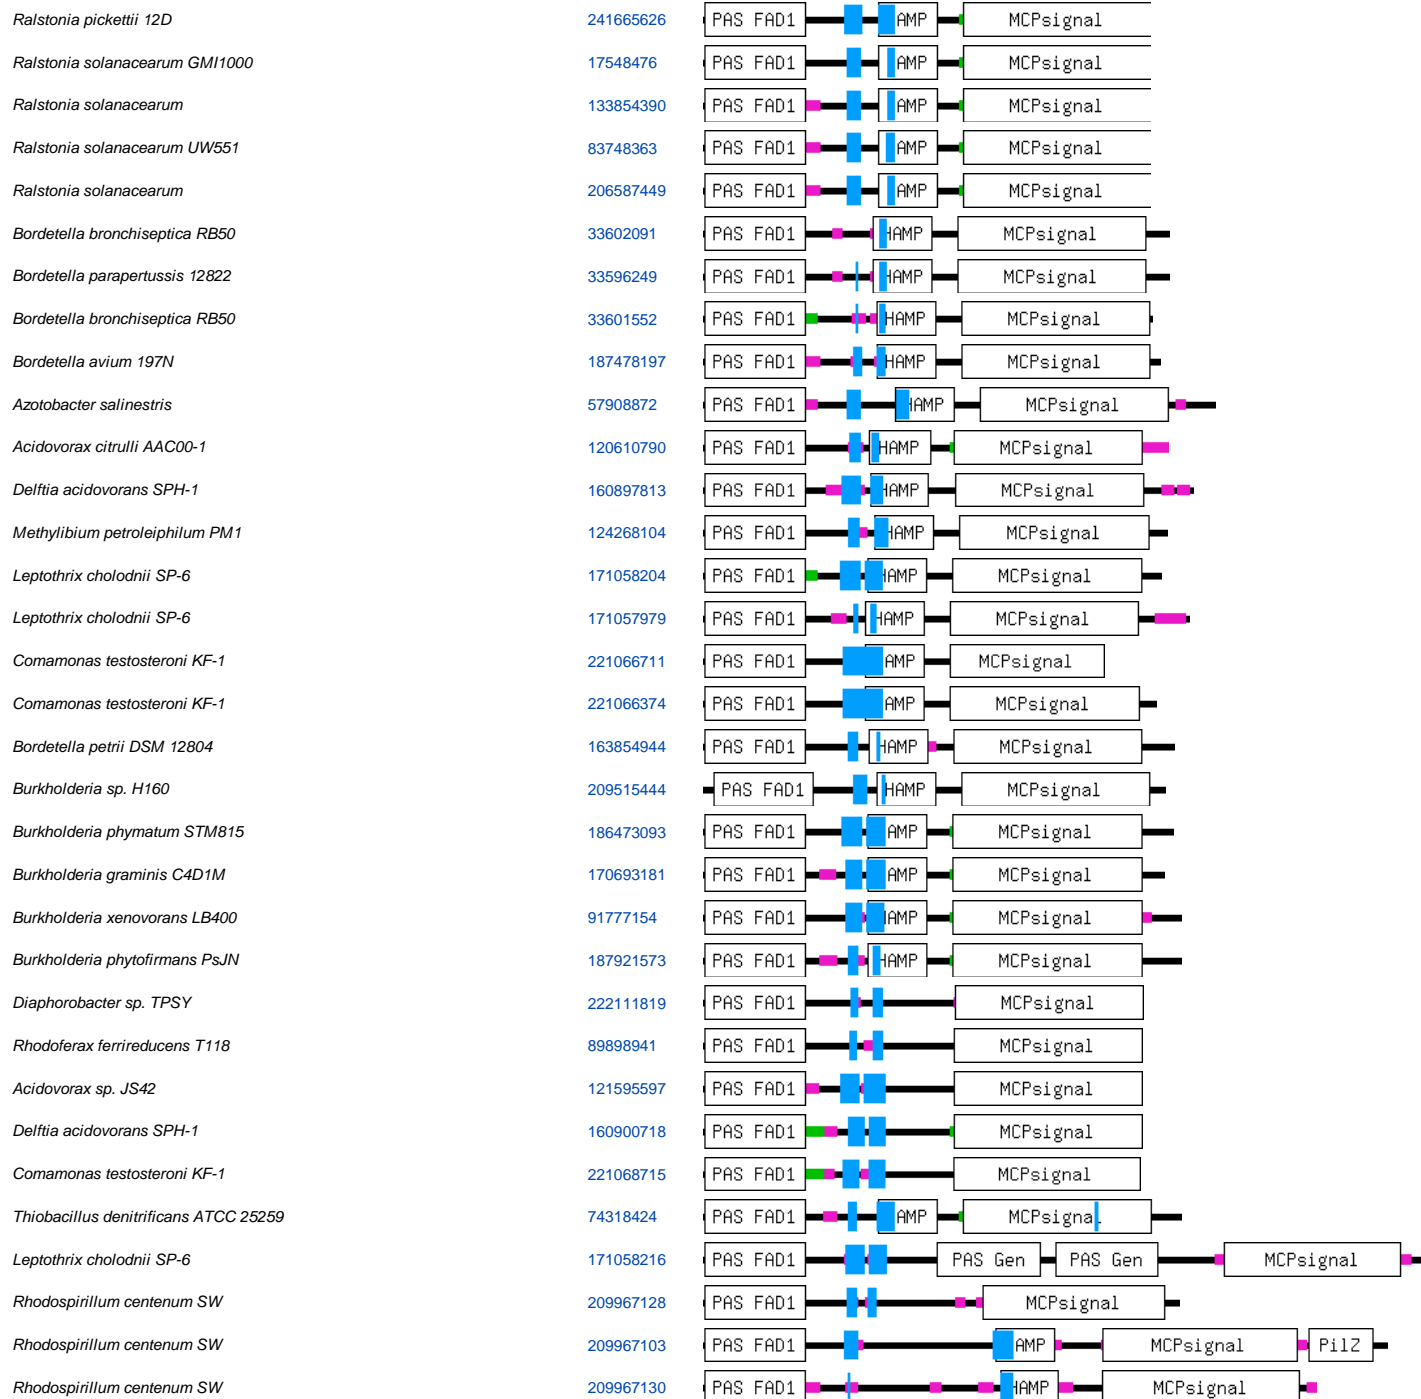

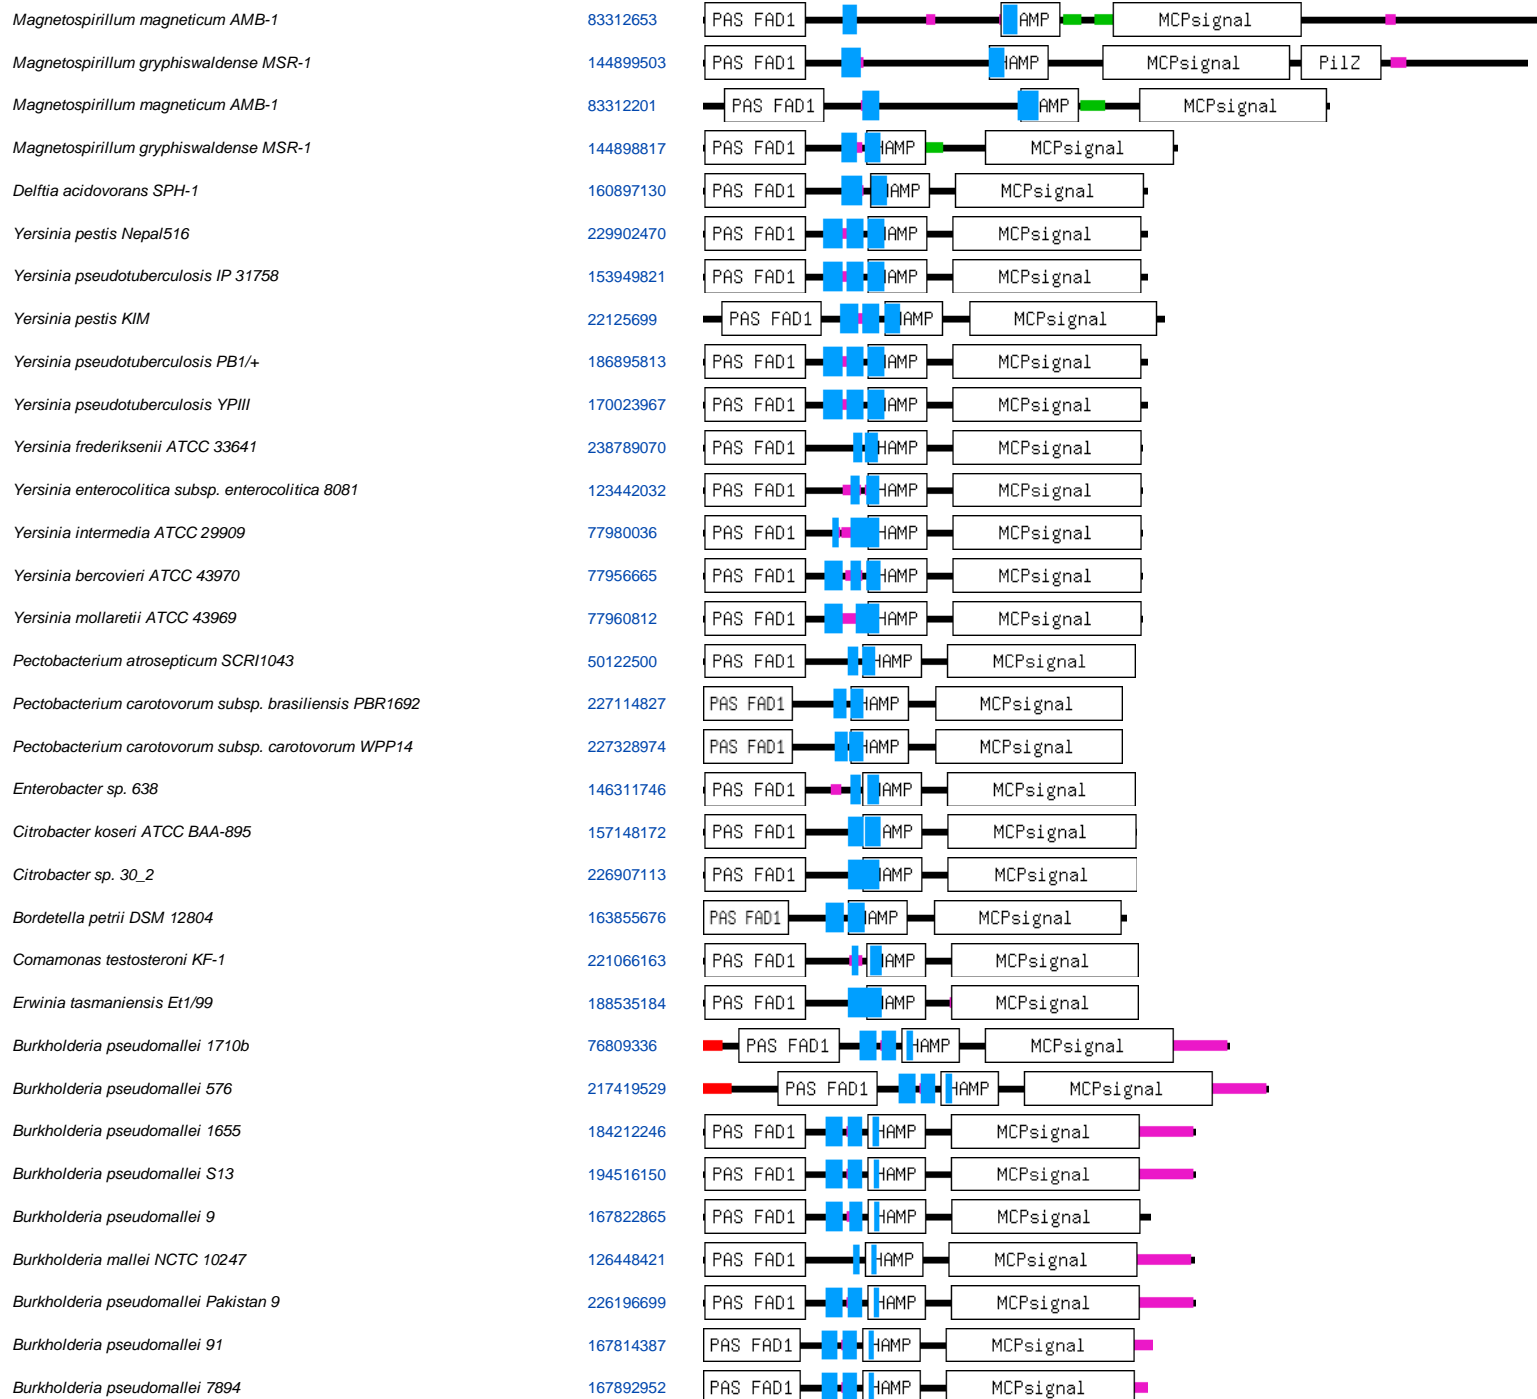

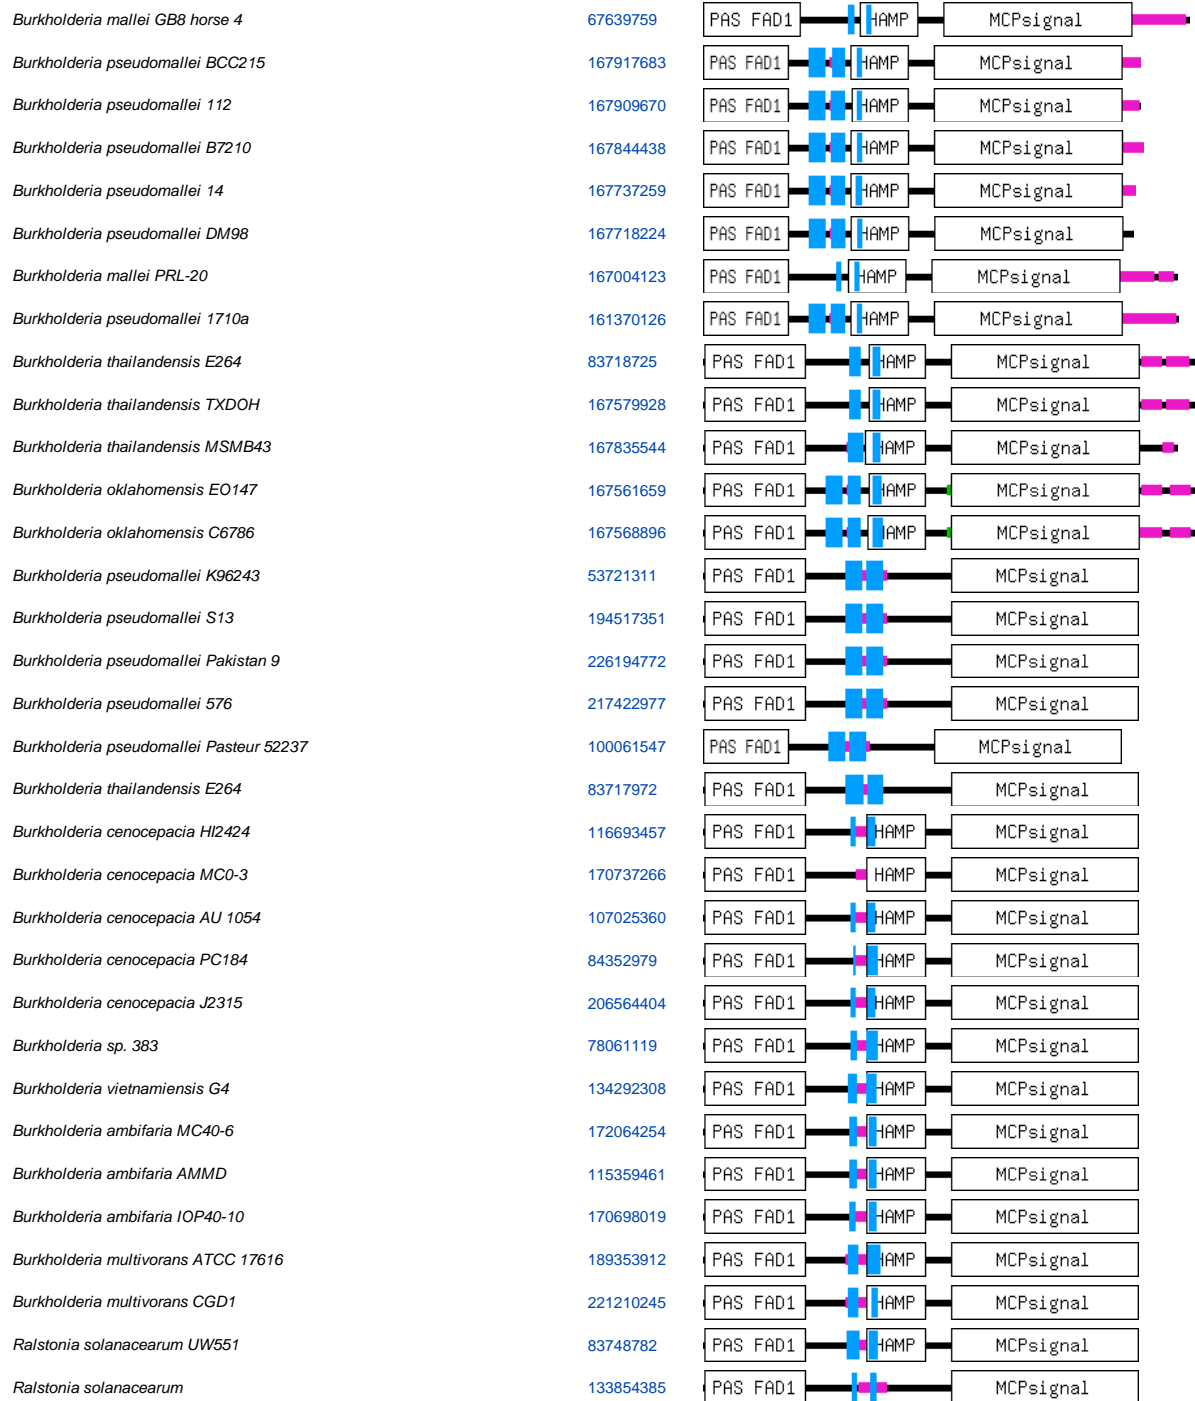

|                                                             |           |                                                                                     |
|-------------------------------------------------------------|-----------|-------------------------------------------------------------------------------------|
| <i>Ralstonia solanacearum</i> GMI1000                       | 17549445  |    |
| <i>Ralstonia eutropha</i> H16                               | 116694983 |   |
| <i>Burkholderia xenovorans</i> LB400                        | 91783410  |   |
| <i>Burkholderia multivorans</i> CGD2M                       | 221200890 |   |
| <i>Burkholderia ambifaria</i> IOP40-10                      | 170698018 |   |
| <i>Burkholderia ambifaria</i> MEX-5                         | 171321576 |   |
| <i>Burkholderia ambifaria</i> AMMD                          | 115359460 |   |
| <i>Burkholderia ambifaria</i> MC40-6                        | 172064253 |   |
| <i>Burkholderia vietnamiensis</i> G4                        | 134292307 |   |
| <i>Burkholderia</i> sp. 383                                 | 78061120  |   |
| <i>Burkholderia cenocepacia</i> PC184                       | 194560768 |   |
| <i>Burkholderia cenocepacia</i> J2315                       | 206564403 |   |
| <i>Burkholderia cenocepacia</i> MC0-3                       | 170737267 |   |
| <i>Burkholderia cenocepacia</i> HI2424                      | 116693456 |   |
| <i>Burkholderia cenocepacia</i> AU 1054                     | 107025361 |   |
| <i>Campylobacter jejuni</i> subsp. <i>jejuni</i> CG8421     | 205356212 |    |
| <i>Campylobacter jejuni</i> subsp. <i>jejuni</i> 84-25      | 88596730  |    |
| <i>Campylobacter jejuni</i> subsp. <i>jejuni</i> 81116      | 157415453 |    |
| <i>Campylobacter jejuni</i> subsp. <i>doylei</i> 269.97     | 153951873 |    |
| <i>Campylobacter upsaliensis</i> RM3195                     | 57505415  |    |
| <i>Campylobacter upsaliensis</i> RM3195                     | 57505413  |   |
| <i>Campylobacter coli</i> RM2228                            | 57168070  |  |
| <i>Campylobacter jejuni</i> subsp. <i>jejuni</i> 260.94     | 86151085  |  |
| <i>Campylobacter jejuni</i> subsp. <i>jejuni</i> CG8421     | 205356214 |  |
| <i>Campylobacter jejuni</i> RM1221                          | 57238063  |  |
| <i>Campylobacter jejuni</i> subsp. <i>jejuni</i> CG8486     | 148926195 |  |
| <i>Campylobacter jejuni</i> subsp. <i>jejuni</i> NCTC 11168 | 15792515  |  |
| <i>Campylobacter lari</i> RM2100                            | 222823964 |  |
| <i>Wolinella succinogenes</i> DSM 1740                      | 34557696  |  |
| <i>Wolinella succinogenes</i> DSM 1740                      | 34557986  |  |
| <i>Wolinella succinogenes</i> DSM 1740                      | 34557107  |  |
| <i>Campylobacter concisus</i> 13826                         | 157165744 |  |
| <i>Campylobacter curvus</i> 525.92                          | 154174054 |  |

|                                               |           |  |
|-----------------------------------------------|-----------|--|
| <i>Sulfurimonas denitrificans</i> DSM 1251    | 78776245  |  |
| <i>Caminibacter mediatlanticus</i> TB-2       | 149193754 |  |
| <i>Caminibacter mediatlanticus</i> TB-2       | 149194227 |  |
| <i>Azoarcus</i> sp. BH72                      | 119899765 |  |
| <i>Dechloromonas aromatica</i> RCB            | 71909619  |  |
| <i>Magnetospirillum magnetotacticum</i> MS-1  | 46203509  |  |
| <i>Rhodospirillum rubrum</i> ATCC 11170       | 83594793  |  |
| <i>Kineococcus radiotolerans</i> SRS30216     | 152967347 |  |
| <i>Magnetospirillum magneticum</i> AMB-1      | 83313108  |  |
| <i>Magnetospirillum magnetotacticum</i> MS-1  | 46201019  |  |
| <i>Magnetospirillum magneticum</i> AMB-1      | 83312799  |  |
| <i>Magnetospirillum gryphiswaldense</i> MSR-1 | 144898373 |  |
| <i>Labrenzia aggregata</i> IAM 12614          | 118588823 |  |
| <i>Magnetospirillum magneticum</i> AMB-1      | 83309684  |  |
| <i>Magnetospirillum magnetotacticum</i> MS-1  | 46200832  |  |
| <i>Magnetospirillum gryphiswaldense</i> MSR-1 | 144901270 |  |
| <i>Magnetospirillum magnetotacticum</i> MS-1  | 23015159  |  |
| <i>Magnetospirillum magneticum</i> AMB-1      | 83309284  |  |
| <i>Rhodopseudomonas palustris</i> CGA009      | 39937372  |  |
| <i>Rhodopseudomonas palustris</i> HaA2        | 86748437  |  |
| <i>Rhodopseudomonas palustris</i> BisB5       | 91978371  |  |
| <i>Bradyrhizobium japonicum</i> USDA 110      | 27378086  |  |
| <i>Rhodopseudomonas palustris</i> HaA2        | 86748196  |  |
| <i>Rhodopseudomonas palustris</i> TIE-1       | 192293334 |  |
| <i>Rhodopseudomonas palustris</i> CGA009      | 39937544  |  |
| <i>Rhodopseudomonas palustris</i> BisA53      | 115526652 |  |
| <i>Rhodopseudomonas palustris</i> BisB18      | 90426133  |  |
| <i>Rhodopseudomonas palustris</i> TIE-1       | 192293044 |  |
| <i>Rhodopseudomonas palustris</i> BisB5       | 91975872  |  |
| <i>Rhodopseudomonas palustris</i> HaA2        | 86748538  |  |
| <i>Bermanella marisrubri</i>                  | 94500119  |  |
| <i>Reinekea blandensis</i> MED297             | 88798040  |  |
| <i>Neptuniibacter caesariensis</i>            | 89093193  |  |

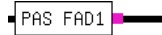

## PAS FAD2 containing methyl-accepting chemotaxis proteins

| Organism                                 | GI        | Domain architecture                                         |
|------------------------------------------|-----------|-------------------------------------------------------------|
| <i>Ruegeria</i> sp. TM1040               | 99078220  | PAS FAD2 PAS Gen PAS FAD2 PAS FAD1-maybe PAS FAD2 MCPsignal |
| <i>Oceanicaulis alexandrii</i> HTCC2633  | 83945017  | PAS Gen PAS Gen PAS Gen PAS FAD1-maybe PAS Gen              |
| <i>Pseudomonas putida</i> W619           | 170722401 | PAS FAD2 PAS FAD2 PAS FAD1-maybe PAS Gen                    |
| <i>Cellvibrio japonicus</i> Ueda107      | 192361936 | PAS Gen PAS Gen PAS FAD1-maybe PAS Gen                      |
| <i>Rhodopseudomonas palustris</i> BisA53 | 115523216 | PAS FAD2 PAS FAD1-maybe PAS FAD2 PAS FAD2 MCPsignal         |
| <i>Leptothrix cholodnii</i> SP-6         | 171057024 | PAS FAD1-maybe PAS FAD2 MCPsignal                           |
| <i>Verrucomicrobiae bacterium</i> DG1235 | 198260512 | JAMP PAS FAD1-maybe PAS FAD2 PAS FAD2 MCPsignal             |
| uncultured crenarchaeote 31-F-01         | 106364387 | MCPsignal PAS FAD1-maybe                                    |
| <i>Bradyrhizobium japonicum</i> USDA 110 | 27376034  | PAS FAD2 PAS FAD2 PAS FAD2 MCPsignal                        |
| <i>Bradyrhizobium</i> sp. BTAi1          | 148253803 | PAS FAD2 PAS FAD2 PAS FAD2 MCPsignal                        |
| <i>Rhodopseudomonas palustris</i> HaA2   | 86750602  | PAS Gen PAS FAD2 PAS FAD2 MCPsignal                         |
| <i>Rhodopseudomonas palustris</i> CGA009 | 39934953  | PAS Gen PAS FAD2 PAS FAD2 MCPsignal                         |
| <i>Rhodopseudomonas palustris</i> TIE-1  | 192290483 | PAS Gen PAS FAD2 PAS FAD2 MCPsignal                         |
| <i>Bradyrhizobium</i> sp. BTAi1          | 148257508 | PAS Gen PAS FAD2 PAS FAD2 MCPsignal                         |
| <i>Bradyrhizobium</i> sp. BTAi1          | 148252483 | PAS FAD2 PAS FAD2 PAS FAD2 MCPsignal                        |
| <i>Rhodopseudomonas palustris</i> HaA2   | 86747734  | PAS FAD2 PAS FAD2 PAS FAD2 MCPsignal                        |
| <i>Rhodopseudomonas palustris</i> BisB5  | 91974708  | PAS FAD2 PAS FAD2 PAS FAD2 MCPsignal                        |
| <i>Rhodopseudomonas palustris</i> CGA009 | 39933508  | PAS FAD2 PAS FAD2 PAS FAD2 MCPsignal                        |
| <i>Rhodopseudomonas palustris</i> TIE-1  | 192288866 | PAS FAD2 PAS FAD2 PAS FAD2 MCPsignal                        |
| <i>Rhodopseudomonas palustris</i> BisB18 | 90425575  | PAS FAD2 PAS FAD2 PAS FAD2 MCPsignal                        |
| <i>Rhodopseudomonas palustris</i> BisA53 | 115526148 | PAS FAD2 PAS FAD2 PAS FAD2 MCPsignal                        |
| <i>Rhodopseudomonas palustris</i> BisB18 | 90425574  | PAS FAD2 PAS FAD2 PAS FAD2 MCPsignal                        |
| <i>Oligotropha carboxidovorans</i> OM5   | 209885932 | PAS FAD2 PAS FAD2 PAS FAD2 MCPsignal                        |
| <i>Rhodopseudomonas palustris</i> BisB18 | 90425987  | PAS FAD2 PAS FAD2 PAS FAD2 MCPsignal                        |
| <i>Rhodopseudomonas palustris</i> BisB5  | 91974707  | PAS FAD2 PAS FAD2 PAS FAD2 MCPsignal                        |
| <i>Alteromonadales bacterium</i> TW-7    | 119471379 | PAS FAD2 PAS FAD2 PAS Gen PAS Gen MCPsignal                 |
| <i>Bradyrhizobium</i> sp. ORS278         | 146337210 | PAS FAD2 PAS FAD2 PAS FAD2 MCPsignal                        |
| <i>Bradyrhizobium</i> sp. ORS278         | 146338351 | PAS FAD2 PAS FAD2 PAS FAD2 MCPsignal                        |
| <i>Arcobacter butzleri</i> RM4018        | 157736853 | PAS FAD2 PAS FAD2 MCPsignal                                 |

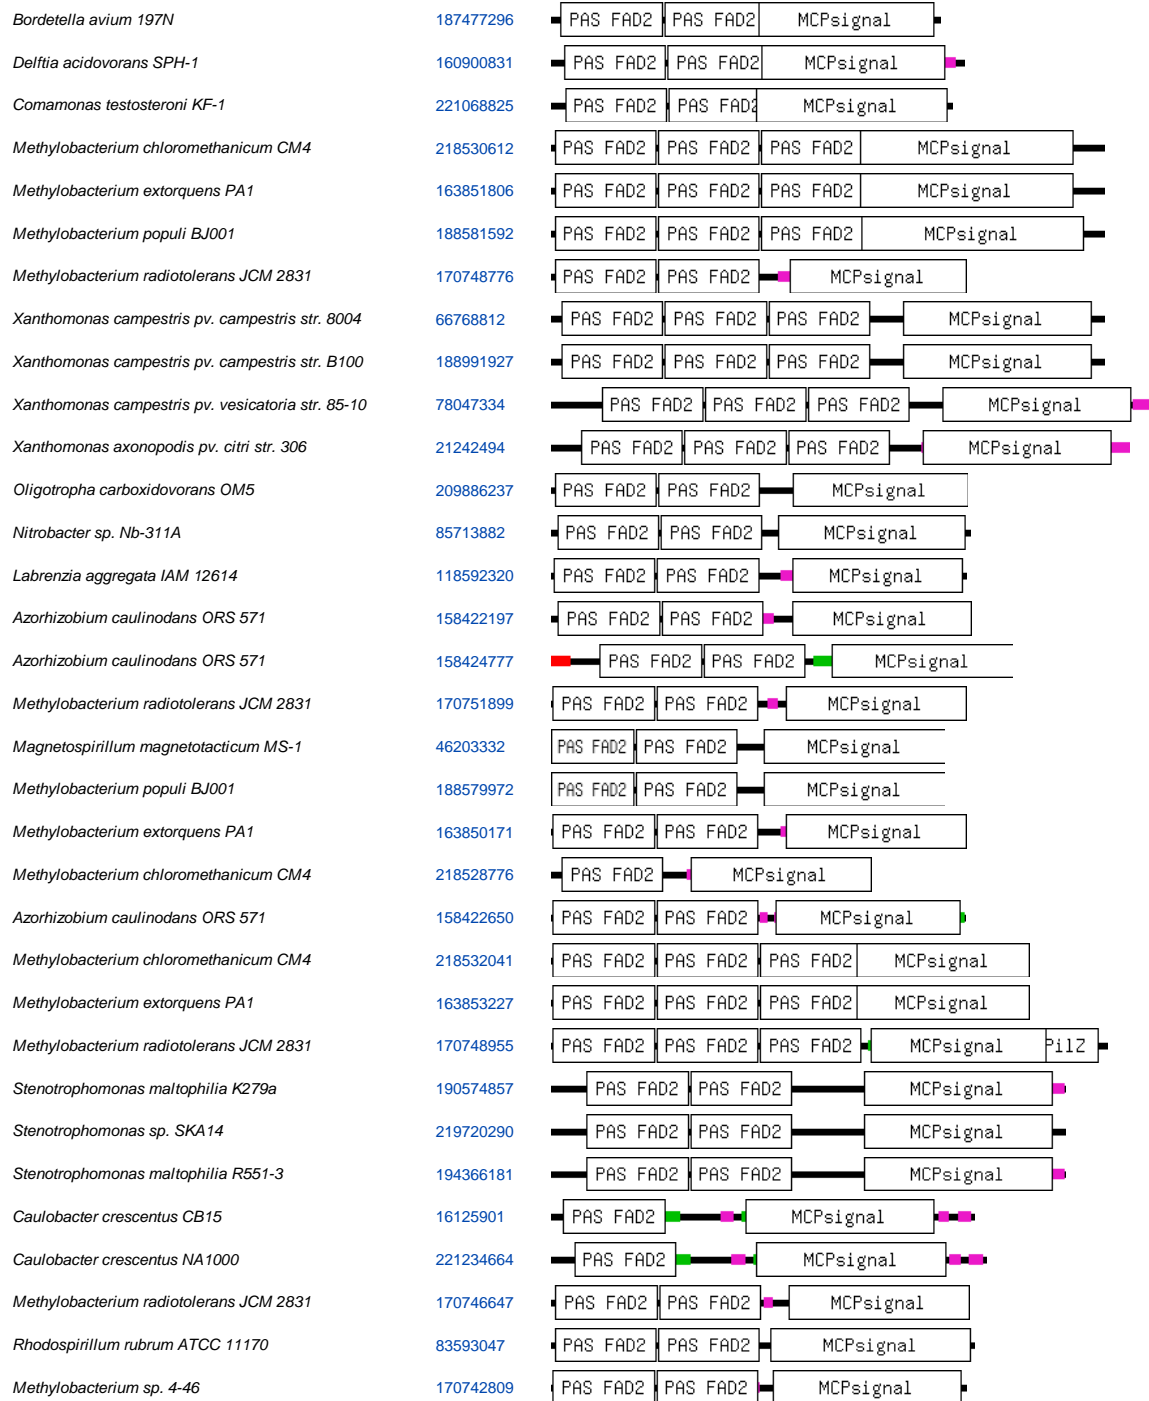



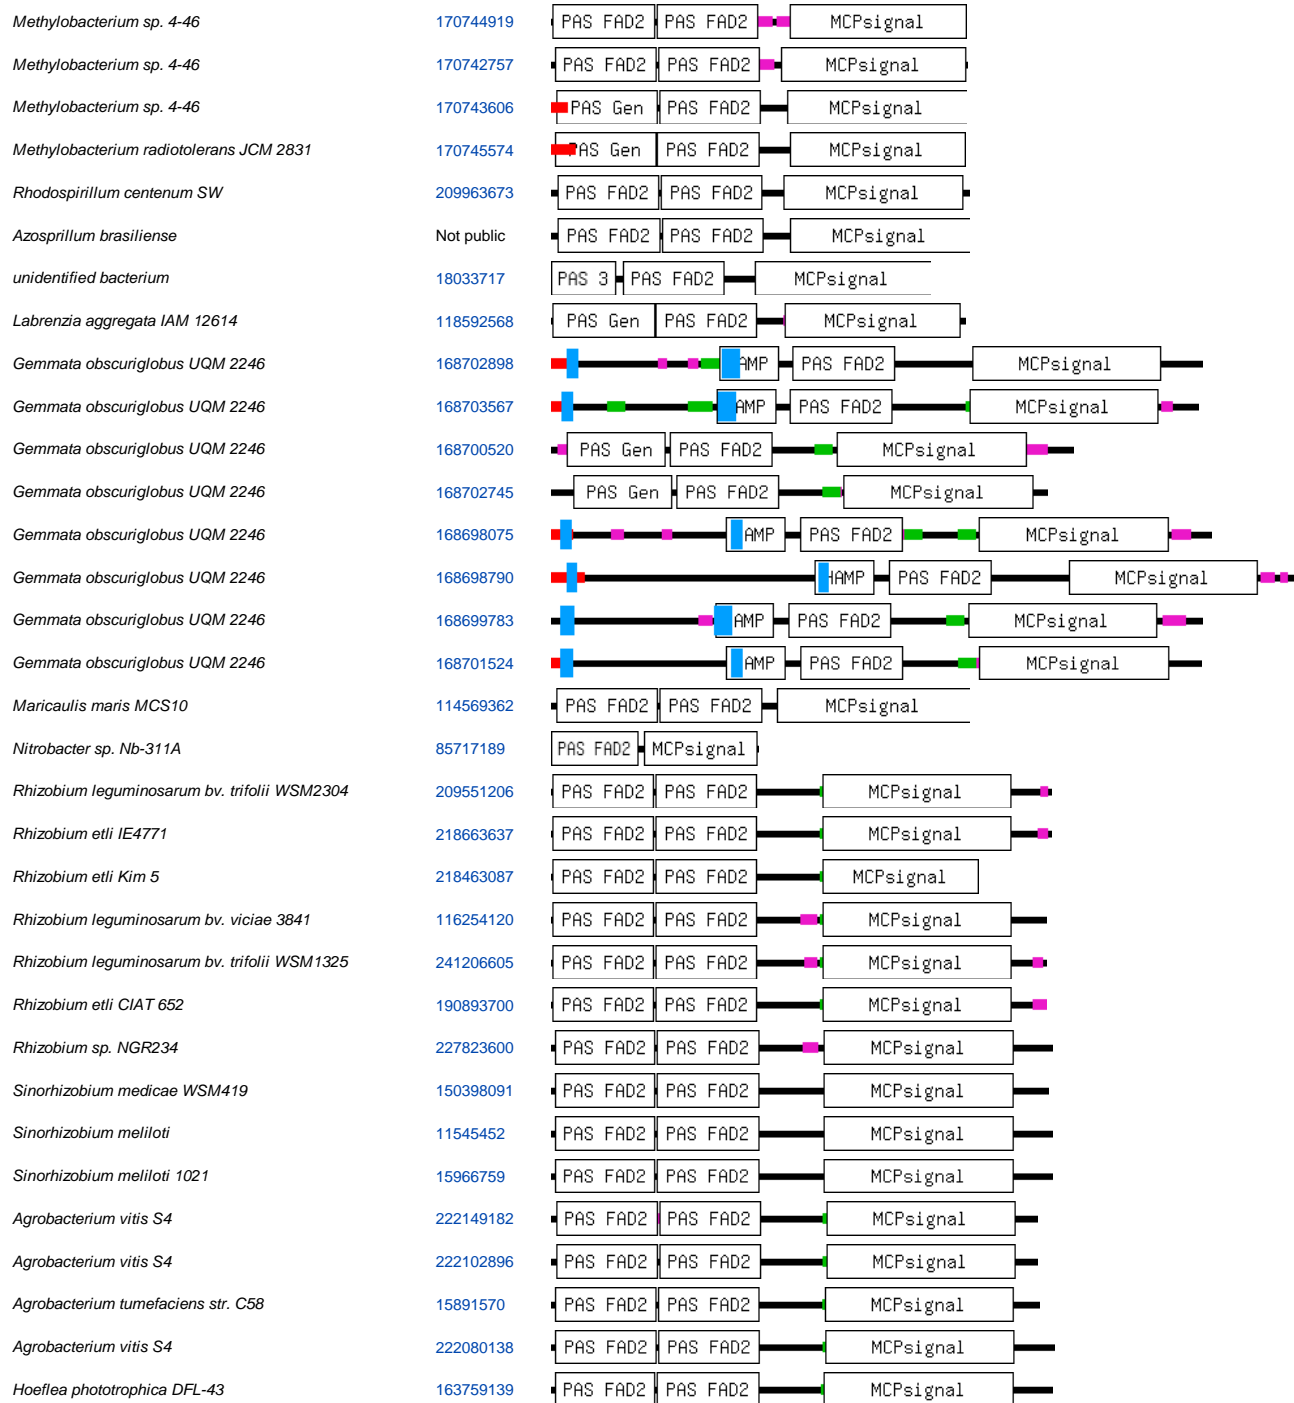

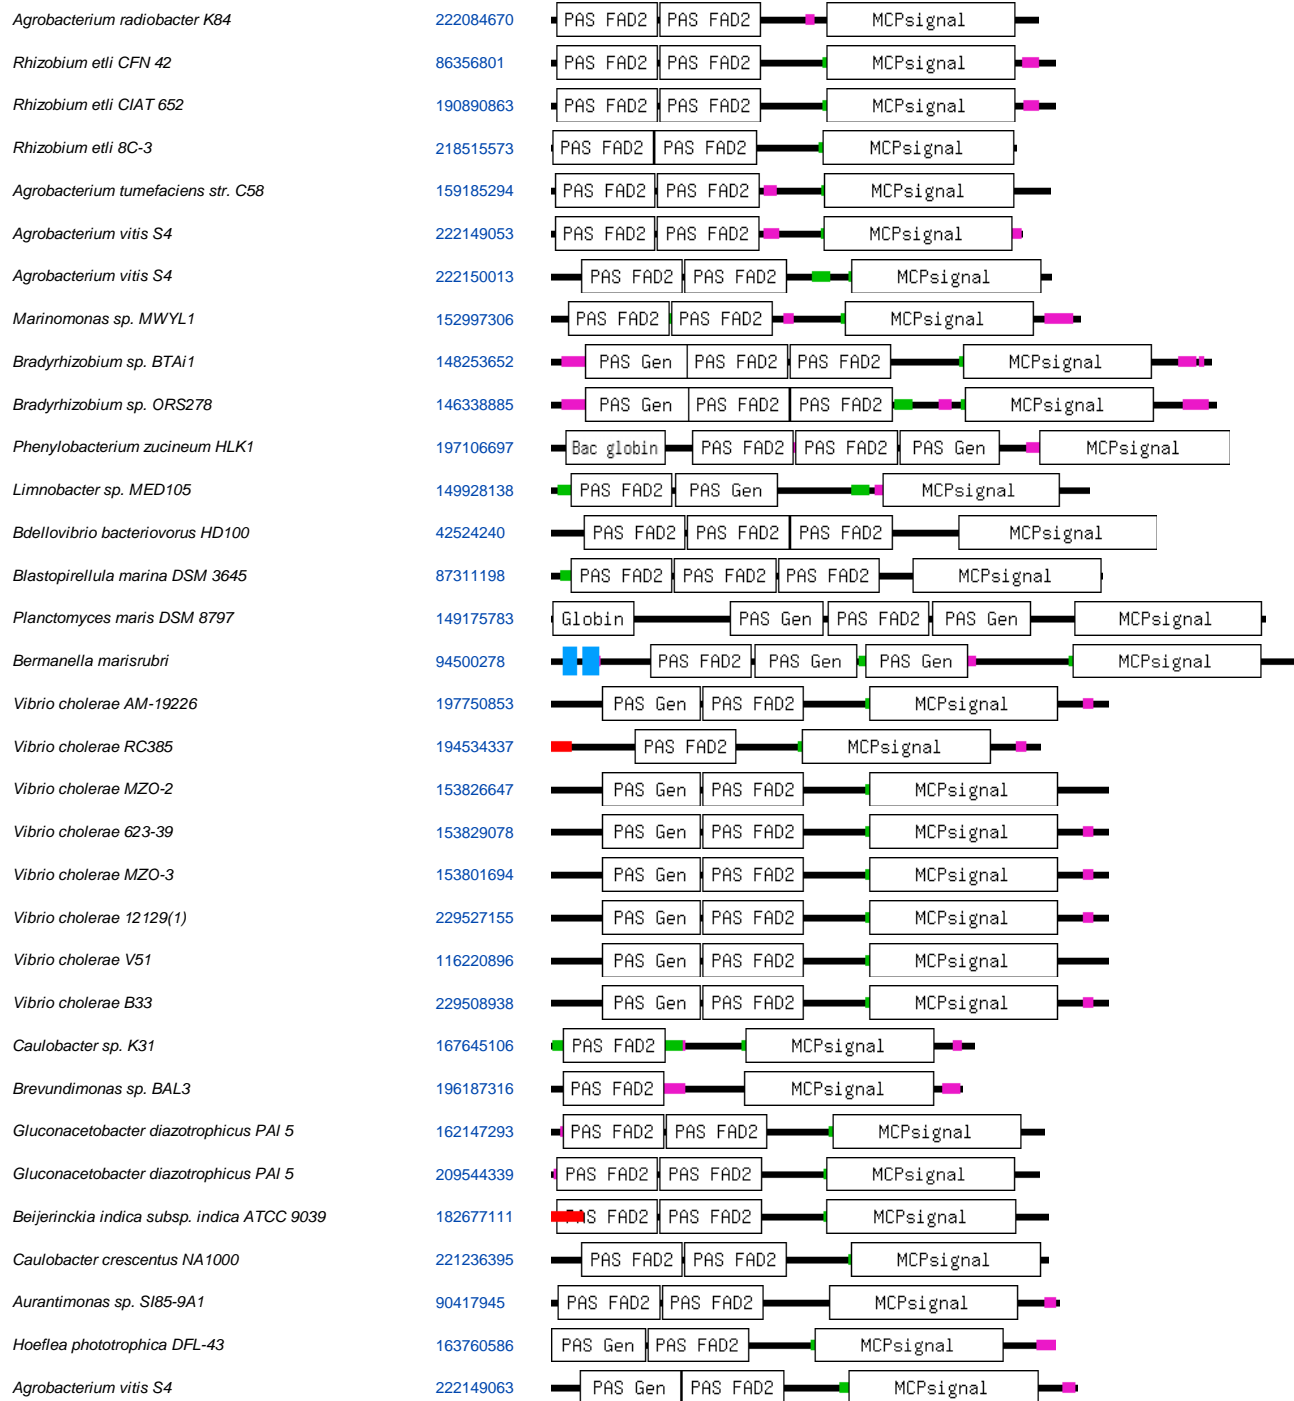

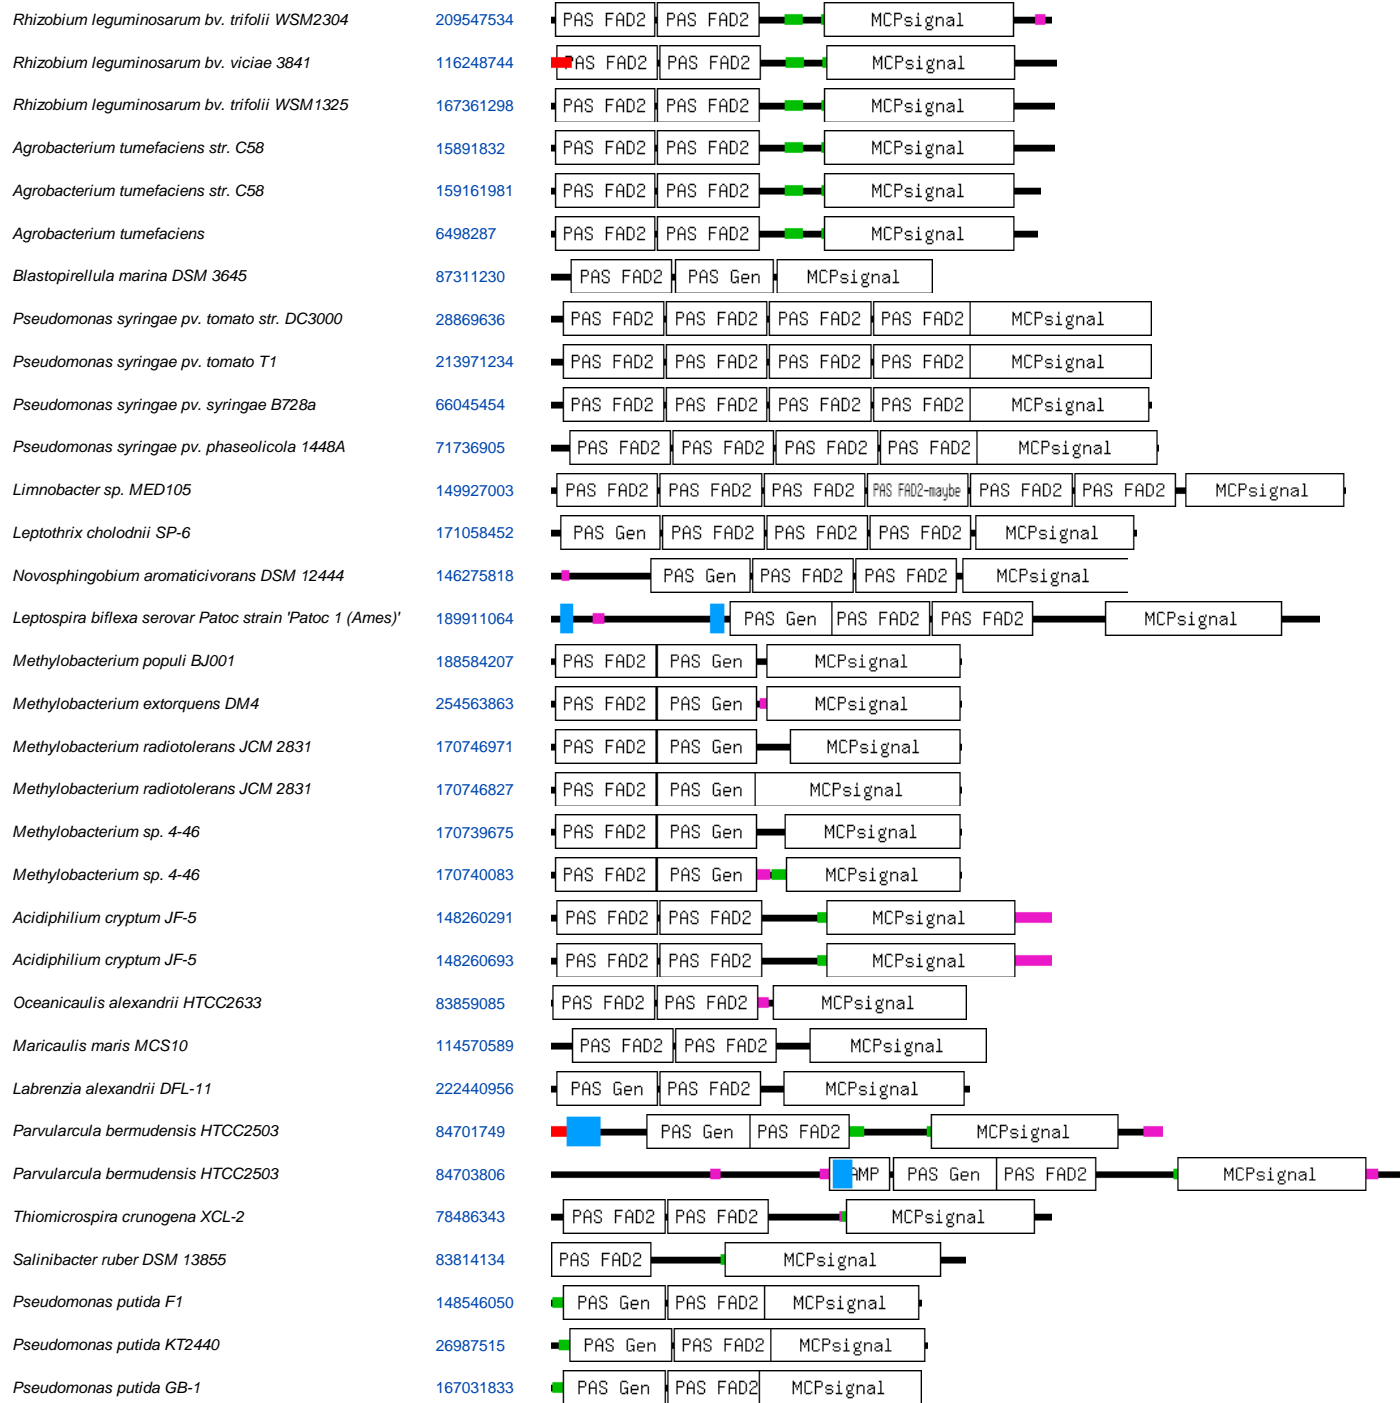

|                                                    |           |                                                                                             |                                                                                              |                                                                                               |
|----------------------------------------------------|-----------|---------------------------------------------------------------------------------------------|----------------------------------------------------------------------------------------------|-----------------------------------------------------------------------------------------------|
| <i>Pseudomonas entomophila</i> L48                 | 104780144 |  PAS Gen   |  PAS FAD2   |  MCPsignal   |
| <i>Pseudomonas putida</i> W619                     | 170723571 |  PAS Gen   |  PAS FAD2   |  MCPsignal   |
| <i>Pseudomonas fluorescens</i> Pf-5                | 70732527  |  PAS Gen   |  PAS FAD2   |  MCPsignal   |
| <i>Pseudomonas fluorescens</i> Pf0-1               | 77460987  |  PAS Gen   |  PAS FAD2   |  MCPsignal   |
| <i>Pseudomonas stutzeri</i> A1501                  | 146282621 |  PAS Gen   |  PAS FAD2   |  MCPsignal   |
| <i>Pseudomonas mendocina</i> ymp                   | 146307996 |  PAS Gen   |  PAS FAD2   |  MCPsignal   |
| <i>Shewanella baltica</i> OS155                    | 126175568 |  PAS Gen   |  PAS FAD2   |  MCPsignal   |
| <i>Shewanella baltica</i> OS185                    | 152999507 |  PAS Gen   |  PAS FAD2   |  MCPsignal   |
| <i>Shewanella putrefaciens</i> CN-32               | 146294059 |  PAS Gen   |  PAS FAD2   |  MCPsignal   |
| <i>Shewanella</i> sp. W3-18-1                      | 120597808 |  PAS Gen   |  PAS FAD2   |  MCPsignal   |
| <i>Shewanella putrefaciens</i> 200                 | 124546283 |  PAS Gen   |  PAS FAD2   |  MCPsignal   |
| <i>Pseudomonas syringae</i> pv. tomato str. DC3000 | 28870064  |  PAS Gen   |  PAS FAD2   |  MCPsignal   |
| <i>Pseudomonas syringae</i> pv. tomato T1          | 213966928 |  PAS Gen   |  PAS FAD2   |  MCPsignal   |
| <i>Pseudomonas syringae</i> pv. phaseolicola 1448A | 71735288  |  PAS Gen   |  PAS FAD2   |  MCPsignal   |
| <i>Pseudomonas syringae</i> pv. syringae           | 15077778  |  PAS Gen   |  PAS FAD2   |  MCPsignal   |
| <i>Pseudomonas syringae</i> pv. syringae B728a     | 66045832  |  PAS Gen   |  PAS FAD2   |  MCPsignal   |
| <i>Alteromonadales bacterium</i> TW-7              | 119472174 |  PAS Gen   |  PAS FAD2   |  MCPsignal   |
| <i>Reinekea blandensis</i> MED297                  | 88798027  |  PAS Gen   |  PAS FAD2   |  MCPsignal   |
| <i>Marinomonas</i> sp. MWYL1                       | 152994435 |  PAS Gen   |  PAS FAD2   |  MCPsignal   |
| <i>Alteromonas macleodii</i> 'Deep ecotype'        | 196158452 |  PAS Gen   |  PAS FAD2   |  MCPsignal   |
| <i>Vibrio parahaemolyticus</i> RIMD 2210633        | 28900467  |  PAS Gen  |  PAS FAD2  |  MCPsignal  |
| <i>Vibrio alginolyticus</i> 12G01                  | 91225724  |  PAS Gen |  PAS FAD2 |  MCPsignal |
| <i>Vibrio</i> sp. Ex25                             | 116186017 |  PAS Gen |  PAS FAD2 |  MCPsignal |
| <i>Pseudomonas syringae</i> pv. tomato str. DC3000 | 28870908  |  PAS Gen |  PAS FAD2 |  MCPsignal |
| <i>Pseudomonas syringae</i> pv. tomato T1          | 213968809 |  PAS Gen |  PAS FAD2 |  MCPsignal |
| <i>Pseudomonas fluorescens</i> Pf-5                | 70732526  |  PAS Gen |  PAS FAD2 |  MCPsignal |
| <i>Pseudomonas syringae</i> pv. tomato str. DC3000 | 28868227  |  PAS Gen |  PAS FAD2 |  MCPsignal |
| <i>Pseudomonas syringae</i> pv. tomato T1          | 213967307 |  PAS Gen |  PAS FAD2 |  MCPsignal |
| <i>Pseudomonas syringae</i> pv. phaseolicola 1448A | 71736057  |  PAS Gen |  PAS FAD2 |  MCPsignal |
| <i>Pseudomonas syringae</i> pv. syringae B728a     | 66044126  |  PAS Gen |  PAS FAD2 |  MCPsignal |
| <i>Pseudomonas putida</i> W619                     | 170722644 |  PAS Gen |  PAS FAD2 |  MCPsignal |
| <i>Idiomarina loihiensis</i> L2TR                  | 56461164  |  PAS Gen |  PAS FAD2 |  MCPsignal |
| <i>Pseudomonas syringae</i> pv. tomato T1          | 213966820 |  PAS Gen |  PAS FAD2 |  MCPsignal |

|                                                      |           |          |          |           |
|------------------------------------------------------|-----------|----------|----------|-----------|
| <i>Pseudomonas viridiflava</i>                       | 51102930  | PAS Gen  | PAS FAD2 | MCPsignal |
| <i>Pseudomonas putida F1</i>                         | 148547569 | PAS FAD2 | PAS FAD2 | MCPsignal |
| <i>Pseudomonas putida KT2440</i>                     | 26990127  | PAS FAD2 | PAS FAD2 | MCPsignal |
| <i>Pseudomonas putida GB-1</i>                       | 167033530 | PAS FAD2 | PAS FAD2 | MCPsignal |
| <i>Pseudomonas entomophila L48</i>                   | 104781535 | PAS FAD2 | PAS FAD2 | MCPsignal |
| <i>Pseudomonas putida W619</i>                       | 170721956 | PAS FAD2 | PAS FAD2 | MCPsignal |
| <i>Pseudomonas fluorescens Pf0-1</i>                 | 77460564  | PAS FAD2 | PAS FAD2 | MCPsignal |
| <i>Pseudomonas fluorescens Pf-5</i>                  | 70731932  | PAS FAD2 | PAS FAD2 | MCPsignal |
| <i>Pseudomonas syringae pv. tomato str. DC3000</i>   | 28872463  | PAS FAD2 | PAS FAD2 | MCPsignal |
| <i>Pseudomonas syringae pv. tomato T1</i>            | 213971195 | PAS FAD2 | PAS FAD2 | MCPsignal |
| <i>Pseudomonas syringae pv. phaseolicola 1448A</i>   | 71735128  | PAS FAD2 | PAS FAD2 | MCPsignal |
| <i>Pseudomonas syringae pv. syringae B728a</i>       | 66048131  | PAS FAD2 | PAS FAD2 | MCPsignal |
| <i>Shewanella amazonensis SB2B</i>                   | 119773792 | PAS FAD2 | PAS FAD2 | MCPsignal |
| <i>Chromohalobacter salexigens DSM 3043</i>          | 92113034  | PAS FAD2 | PAS FAD2 | MCPsignal |
| <i>Chromohalobacter salexigens DSM 3043</i>          | 92113033  | PAS FAD2 | PAS FAD2 | MCPsignal |
| <i>Pseudomonas fluorescens Pf-5</i>                  | 70731875  | PAS FAD2 | PAS FAD2 | MCPsignal |
| <i>Pseudomonas fluorescens Pf0-1</i>                 | 77460529  | PAS FAD2 | PAS FAD2 | MCPsignal |
| <i>Pseudomonas aeruginosa PA7</i>                    | 152987347 | PAS FAD2 | PAS FAD2 | MCPsignal |
| <i>Pseudomonas aeruginosa UCBPP-PA14</i>             | 116049369 | PAS FAD2 | PAS FAD2 | MCPsignal |
| <i>Pseudomonas aeruginosa 2192</i>                   | 194550759 | PAS FAD2 | PAS FAD2 | MCPsignal |
| <i>Pseudomonas aeruginosa LESB58</i>                 | 218892704 | PAS FAD2 | PAS FAD2 | MCPsignal |
| <i>Pseudomonas aeruginosa C3719</i>                  | 84321813  | PAS FAD2 | PAS FAD2 | MCPsignal |
| <i>Campylobacter jejuni subsp. jejuni 260.94</i>     | 86151016  | PAS FAD2 | PAS FAD2 | MCPsignal |
| <i>Campylobacter jejuni RM1221</i>                   | 57237992  | PAS FAD2 | PAS FAD2 | MCPsignal |
| <i>Campylobacter jejuni subsp. jejuni 81116</i>      | 157415371 | PAS FAD2 | PAS FAD2 | MCPsignal |
| <i>Campylobacter jejuni subsp. jejuni HB93-13</i>    | 86152624  | PAS FAD2 | PAS FAD2 | MCPsignal |
| <i>Campylobacter jejuni subsp. doylei 269.97</i>     | 153951158 | PAS FAD2 | PAS FAD2 | MCPsignal |
| <i>Campylobacter jejuni subsp. jejuni NCTC 11168</i> | 15792435  | PAS FAD2 | PAS FAD2 | MCPsignal |
| <i>Campylobacter jejuni subsp. jejuni CG8486</i>     | 148925991 | PAS FAD2 | PAS FAD2 | MCPsignal |
| <i>Campylobacter jejuni subsp. jejuni CG8421</i>     | 205355856 | PAS FAD2 | PAS FAD2 | MCPsignal |
| <i>Campylobacter lari RM2100</i>                     | 222824202 | PAS FAD2 | PAS FAD2 | MCPsignal |
| <i>Campylobacter fetus subsp. fetus 82-40</i>        | 118474888 | PAS FAD2 | PAS FAD2 | MCPsignal |
| <i>Chromobacterium violaceum ATCC 12472</i>          | 34497153  | PAS FAD2 | PAS FAD2 | MCPsignal |

|                                                                |           |                                                                                     |                                                                                     |                                                                                     |
|----------------------------------------------------------------|-----------|-------------------------------------------------------------------------------------|-------------------------------------------------------------------------------------|-------------------------------------------------------------------------------------|
| <i>Chromobacterium violaceum</i> ATCC 12472                    | 34496909  | 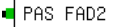   |    |    |
| <i>Shewanella baltica</i> OS223                                | 217974830 |    |    |    |
| <i>Shewanella baltica</i> OS155                                | 126172837 |    |    |    |
| <i>Shewanella baltica</i> OS195                                | 160876967 |    |    |    |
| <i>Shewanella baltica</i> OS185                                | 153002243 |    |    |    |
| <i>Shewanella</i> sp. ANA-3                                    | 117919084 |    |    |    |
| <i>Shewanella</i> sp. MR-7                                     | 114048885 |    |    |    |
| <i>Shewanella</i> sp. MR-4                                     | 113968976 |    |    |    |
| <i>Shewanella</i> sp. W3-18-1                                  | 120600305 |    |    |    |
| <i>Shewanella putrefaciens</i> CN-32                           | 146291766 |    |    |    |
| <i>Shewanella putrefaciens</i> 200                             | 124545590 |    |    |    |
| <i>Shewanella woodyi</i> ATCC 51908                            | 170728284 |    |    |    |
| <i>Hahella chejuensis</i> KCTC 2396                            | 83645852  |    |    |    |
| <i>Pseudomonas aeruginosa</i> PA7                              | 152988016 |    |    |    |
| <i>Pseudomonas aeruginosa</i> UCBPP-PA14                       | 116049884 |    |    |    |
| <i>Pseudomonas aeruginosa</i> 2192                             | 84327770  |    |    |    |
| <i>Pseudomonas aeruginosa</i> 2192                             | 194551306 |    |    |    |
| <i>Pseudomonas aeruginosa</i> LESB58                           | 218892112 |    |    |    |
| <i>Pseudomonas aeruginosa</i> PAO1                             | 15597126  |    |    |    |
| <i>Pseudomonas aeruginosa</i> C3719                            | 194546007 |    |    |    |
| <i>Idiomarina loihiensis</i> L2TR                              | 56460774  |  |  |  |
| <i>Idiomarina baltica</i> OS145                                | 85711422  |  |  |  |
| <i>Aeromonas hydrophila</i> subsp. <i>hydrophila</i> ATCC 7966 | 117621338 |  |  |  |
| <i>Aeromonas salmonicida</i> subsp. <i>salmonicida</i> A449    | 145299996 |  |  |  |
| <i>Marinomonas</i> sp. MWYL1                                   | 152997925 |  |  |  |
| <i>Marinomonas</i> sp. MWYL1                                   | 152997926 |  |  |  |
| <i>Pseudoalteromonas atlantica</i> T6c                         | 109899778 |  |  |  |
| <i>Aeromonas hydrophila</i> subsp. <i>hydrophila</i> ATCC 7966 | 117617928 |  |  |  |
| <i>Vibrio parahaemolyticus</i> RIMD 2210633                    | 28900409  |  |  |  |
| <i>Vibrio parahaemolyticus</i> AQ3810                          | 153837387 |  |  |  |
| <i>Vibrio cholerae</i> RC385                                   | 116218265 |  |  |  |
| <i>Vibrio cholerae</i> 12129(1)                                | 229528283 |  |  |  |
| <i>Vibrio cholerae</i> V51                                     | 194538248 |  |  |  |

|                                                                  |           |          |          |           |
|------------------------------------------------------------------|-----------|----------|----------|-----------|
| <i>Vibrio cholerae</i> MZO-2                                     | 153825378 | PAS FAD2 | PAS FAD2 | MCPsignal |
| <i>Vibrio cholerae</i> O395                                      | 227120061 | PAS FAD2 | PAS FAD2 | MCPsignal |
| <i>Vibrio cholerae</i> MZO-3                                     | 153800485 | PAS FAD2 | PAS FAD2 | MCPsignal |
| <i>Vibrio cholerae</i> 1587                                      | 153216706 | PAS FAD2 | PAS FAD2 | MCPsignal |
| <i>Vibrio cholerae</i> NCTC 8457                                 | 153817041 | PAS FAD2 | PAS FAD2 | MCPsignal |
| <i>Aeromonas hydrophila</i> subsp. <i>hydrophila</i> ATCC 7966   | 117619786 | PAS FAD2 | PAS FAD2 | MCPsignal |
| <i>Marinomonas</i> sp. MED121                                    | 87122479  | PAS FAD2 | PAS FAD2 | MCPsignal |
| <i>Marinobacter algicola</i> DG893                               | 149375939 | PAS FAD2 | PAS FAD2 | MCPsignal |
| <i>Shewanella</i> sp. ANA-3                                      | 117920693 | PAS FAD2 | PAS FAD2 | MCPsignal |
| <i>Cellvibrio japonicus</i> Ueda107                              | 192361221 | PAS FAD2 | PAS FAD2 | MCPsignal |
| <i>Shewanella baltica</i> OS155                                  | 126175574 | PAS FAD2 | PAS FAD2 | MCPsignal |
| <i>Marinomonas</i> sp. MWYL1                                     | 152994182 | PAS FAD2 | PAS FAD2 | MCPsignal |
| <i>Shewanella loihica</i> PV-4                                   | 127511824 | PAS FAD2 | PAS FAD2 | MCPsignal |
| <i>Thioalkalivibrio</i> sp. HL-EbGR7                             | 220934135 | PAS FAD2 | PAS FAD2 | MCPsignal |
| <i>Thioalkalivibrio</i> sp. K90mix                               | 224817844 | PAS FAD2 | PAS FAD2 | MCPsignal |
| <i>Vibrionales bacterium</i> SWAT-3                              | 148974015 | PAS FAD2 | PAS FAD2 | MCPsignal |
| <i>Vibrio cholerae</i> 1587                                      | 153212690 | PAS FAD2 | PAS FAD2 | MCPsignal |
| <i>Vibrio cholerae</i> AM-19226                                  | 197752391 | PAS FAD2 | PAS FAD2 | MCPsignal |
| <i>Vibrio cholerae</i> 623-39                                    | 153830160 | PAS FAD2 | PAS FAD2 | MCPsignal |
| <i>Vibrio cholerae</i> M66-2                                     | 227081577 | PAS FAD2 | PAS FAD2 | MCPsignal |
| <i>Vibrio cholerae</i> B33                                       | 229511312 | PAS FAD2 | PAS FAD2 | MCPsignal |
| <i>Vibrio cholerae</i> MZO-2                                     | 153826993 | PAS FAD2 | PAS FAD2 | MCPsignal |
| <i>Vibrio cholerae</i> O395                                      | 227117871 | PAS FAD2 | PAS FAD2 | MCPsignal |
| <i>Vibrio cholerae</i> V51                                       | 194537545 | PAS FAD2 | PAS FAD2 | MCPsignal |
| <i>Vibrio cholerae</i> MZO-3                                     | 183179389 | PAS FAD2 | PAS FAD2 | MCPsignal |
| <i>Cronobacter sakazakii</i> ATCC BAA-894                        | 156935923 | PAS FAD2 | PAS FAD2 | MCPsignal |
| <i>Serratia proteamaculans</i> 568                               | 157369715 | PAS FAD2 | PAS FAD2 | MCPsignal |
| <i>Yersinia mollaretii</i> ATCC 43969                            | 238798475 | PAS FAD2 | PAS FAD2 | MCPsignal |
| <i>Yersinia frederiksenii</i> ATCC 33641                         | 238788812 | PAS FAD2 | PAS FAD2 | MCPsignal |
| <i>Yersinia enterocolitica</i> subsp. <i>enterocolitica</i> 8081 | 123443063 | PAS FAD2 | PAS FAD2 | MCPsignal |
| <i>Yersinia pseudotuberculosis</i> IP 31758                      | 153950307 | PAS FAD2 | PAS FAD2 | MCPsignal |
| <i>Yersinia pseudotuberculosis</i> YPIII                         | 170023838 | PAS FAD2 | PAS FAD2 | MCPsignal |
| <i>Yersinia pseudotuberculosis</i> PB1/+                         | 186895951 | PAS FAD2 | PAS FAD2 | MCPsignal |

|                                         |           |          |           |           |           |
|-----------------------------------------|-----------|----------|-----------|-----------|-----------|
| <i>Yersinia pestis</i> CA88-4125        | 149365576 | PAS FAD2 | PAS FAD2  | MCPsignal |           |
| <i>Yersinia pestis</i> Pestoides A      | 229895248 | PAS FAD2 | PAS FAD2  | MCPsignal |           |
| <i>Yersinia pestis</i> Nepal516         | 229902608 | PAS FAD2 | PAS FAD2  | MCPsignal |           |
| <i>Yersinia pestis</i> KIM              | 22125567  | PAS FAD2 | PAS FAD2  | MCPsignal |           |
| <i>Leptospirillum</i> sp. Group II UBA  | 124515593 | PAS FAD2 | MCPsignal |           |           |
| <i>Bordetella avium</i> 197N            | 187476865 | PAS FAD2 | PAS FAD2  | MCPsignal |           |
| <i>Jannaschia</i> sp. CCS1              | 89053870  | PAS FAD2 | MCPsignal |           |           |
| <i>Ruegeria</i> sp. TM1040              | 99081328  | PAS FAD2 | MCPsignal |           |           |
| <i>Roseovarius</i> sp. HTCC2601         | 114762921 | PAS FAD2 | MCPsignal |           |           |
| <i>Roseobacter</i> sp. AzwK-3b          | 149912680 | PAS FAD2 | MCPsignal |           |           |
| <i>Roseobacter</i> sp. SK209-2-6        | 126737020 | PAS FAD2 | MCPsignal |           |           |
| <i>Roseobacter</i> sp. MED193           | 86135823  | PAS FAD2 | MCPsignal |           |           |
| <i>Rhodobacterales</i> bacterium Y4l    | 206687260 | PAS FAD2 | MCPsignal |           |           |
| <i>Roseobacter</i> sp. SK209-2-6        | 126739491 | PAS FAD2 | MCPsignal |           |           |
| <i>Ruegeria</i> sp. R11                 | 214030216 | PAS FAD2 | MCPsignal |           |           |
| <i>Phaeobacter gallaeciensis</i> 2.10   | 163743846 | PAS FAD2 | MCPsignal |           |           |
| <i>Phaeobacter gallaeciensis</i> BS107  | 163739670 | PAS FAD2 | MCPsignal |           |           |
| <i>Sagittula stellata</i> E-37          | 126728813 | PAS FAD2 | MCPsignal |           |           |
| <i>Saccharophagus degradans</i> 2-40    | 90022747  | PAS FAD2 | PAS Gen   | PAS Gen   | MCPsignal |
| <i>Gemmatimonas aurantiaca</i> T-27     | 226226217 | PAS FAD2 | PAS FAD2  | MCPsignal |           |
| <i>Acidovorax</i> sp. JS42              | 121592485 | PAS FAD2 | PAS FAD2  | MCPsignal |           |
| <i>Diaphorobacter</i> sp. TPSY          | 222109294 | PAS FAD2 | PAS FAD2  | MCPsignal |           |
| <i>Anoxybacillus flavithermus</i> WK1   | 212639805 | PAS FAD2 | MCPsignal |           |           |
| <i>Bacillus</i> sp. NRRL B-14911        | 89098292  | PAS FAD2 | MCPsignal |           |           |
| <i>Bacillus coahuilensis</i> m4-4       | 205374790 | PAS FAD2 | MCPsignal |           |           |
| <i>Paenibacillus</i> sp. JDR-2          | 169187546 | PAS FAD2 | MCPsignal |           |           |
| <i>Bacillus pumilus</i> SAFR-032        | 157693297 | PAS FAD2 | MCPsignal |           |           |
| <i>Bacillus pumilus</i> ATCC 7061       | 194017342 | PAS FAD2 | MCPsignal |           |           |
| <i>Exiguobacterium sibiricum</i> 255-15 | 172057579 | PAS FAD2 | MCPsignal |           |           |
| <i>Exiguobacterium</i> sp. AT1b         | 229917521 | PAS FAD2 | MCPsignal |           |           |
| <i>Bacillus</i> sp. B14905              | 126652946 | PAS FAD2 | MCPsignal |           |           |
| <i>Lysinibacillus sphaericus</i> C3-41  | 169825647 | PAS FAD2 | MCPsignal |           |           |
| <i>Oceanobacillus iheyensis</i> HTE831  | 23098712  | PAS FAD2 | MCPsignal |           |           |



|                                                     |           |                            |
|-----------------------------------------------------|-----------|----------------------------|
| <i>Exiguobacterium</i> sp. AT1b                     | 229916018 | PAS FAD2 MCPsignal         |
| <i>Exiguobacterium sibiricum</i> 255-15             | 172057534 | PAS FAD2 MCPsignal         |
| <i>Exiguobacterium arabatum</i>                     | 183223730 | PAS FAD2 MCPsignal         |
| <i>Bacillus cereus</i> E33L                         | 67078237  | PAS FAD2 MCPsignal         |
| <i>Bacillus cereus</i> Q1                           | 221642228 | PAS FAD2 MCPsignal         |
| <i>Bacillus cytotoxicus</i> NVH 391-98              | 152975936 | PAS FAD2 MCPsignal         |
| <i>Bacillus selenitireducens</i> MLS10              | 163764662 | PAS FAD2 MCPsignal         |
| <i>Listeria welshimeri</i> serovar 6b str. SLCC5334 | 116873133 | PAS FAD2 MCPsignal         |
| <i>Listeria innocua</i> Clp11262                    | 16800875  | PAS FAD2 MCPsignal         |
| <i>Listeria monocytogenes</i> HCC23                 | 217964152 | PAS FAD2 MCPsignal         |
| <i>Listeria monocytogenes</i> str. 1/2a F6854       | 47097659  | PAS FAD2 MCPsignal         |
| <i>Listeria monocytogenes</i> Finland 1988          | 224499579 | PAS FAD2 MCPsignal         |
| <i>Listeria monocytogenes</i> str. 4b F2365         | 46907930  | PAS FAD2 MCPsignal         |
| <i>Listeria monocytogenes</i> Clp80459              | 226224302 | PAS FAD2 MCPsignal         |
| <i>Caulobacter crescentus</i> CB15                  | 16127042  | PAS FAD2 MCPsignal         |
| <i>Caulobacter crescentus</i> NA1000                | 221235837 | PAS FAD2 MCPsignal         |
| <i>Acidiphilium cryptum</i> JF-5                    | 148260586 | PAS Gen PAS FAD2 MCPsignal |

### Unclassified (general) PAS containing methyl-accepting chemotaxis proteins

| Organism                                  | GI        | Domain architecture            |
|-------------------------------------------|-----------|--------------------------------|
| <i>Roseobacter denitrificans</i> OCh 114  | 110680740 | PAS Gen MCPsignal              |
| <i>Roseobacter denitrificans</i> OCh 114  | 110679750 | IAMP PAS Gen PAS Gen MCPsignal |
| <i>Roseobacter litoralis</i> Och 149      | 163735331 | IAMP PAS Gen PAS Gen MCPsignal |
| <i>Roseobacter</i> sp. GAI101             | 214042265 | IAMP PAS Gen PAS Gen MCPsignal |
| <i>Rhodobacterales bacterium</i> HTCC2654 | 84683864  | IAMP PAS Gen PAS Gen MCPsignal |
| <i>Rhodobacterales bacterium</i> HTCC2654 | 84686846  | IAMP PAS Gen PAS Gen MCPsignal |
| <i>Erwinia tasmaniensis</i> Et1/99        | 188535075 | PAS Gen IAMP MCPsignal         |
| <i>Shewanella woodyi</i> ATCC 51908       | 170725923 | PAS Gen IAMP MCPsignal         |
| <i>Laribacter hongkongensis</i> HLHK9     | 226939049 | PAS Gen IAMP MCPsignal         |
| <i>Marinomonas</i> sp. MED121             | 87121651  | PAS Gen IAMP MCPsignal         |
| <i>Azorhizobium caulinodans</i> ORS 571   | 158425342 | PAS Gen MCPsignal              |
| <i>Bradyrhizobium</i> sp. BTAi1           | 148255342 | PAS Gen MCPsignal              |
| <i>Bradyrhizobium</i> sp. ORS278          | 146340816 | PAS Gen MCPsignal              |

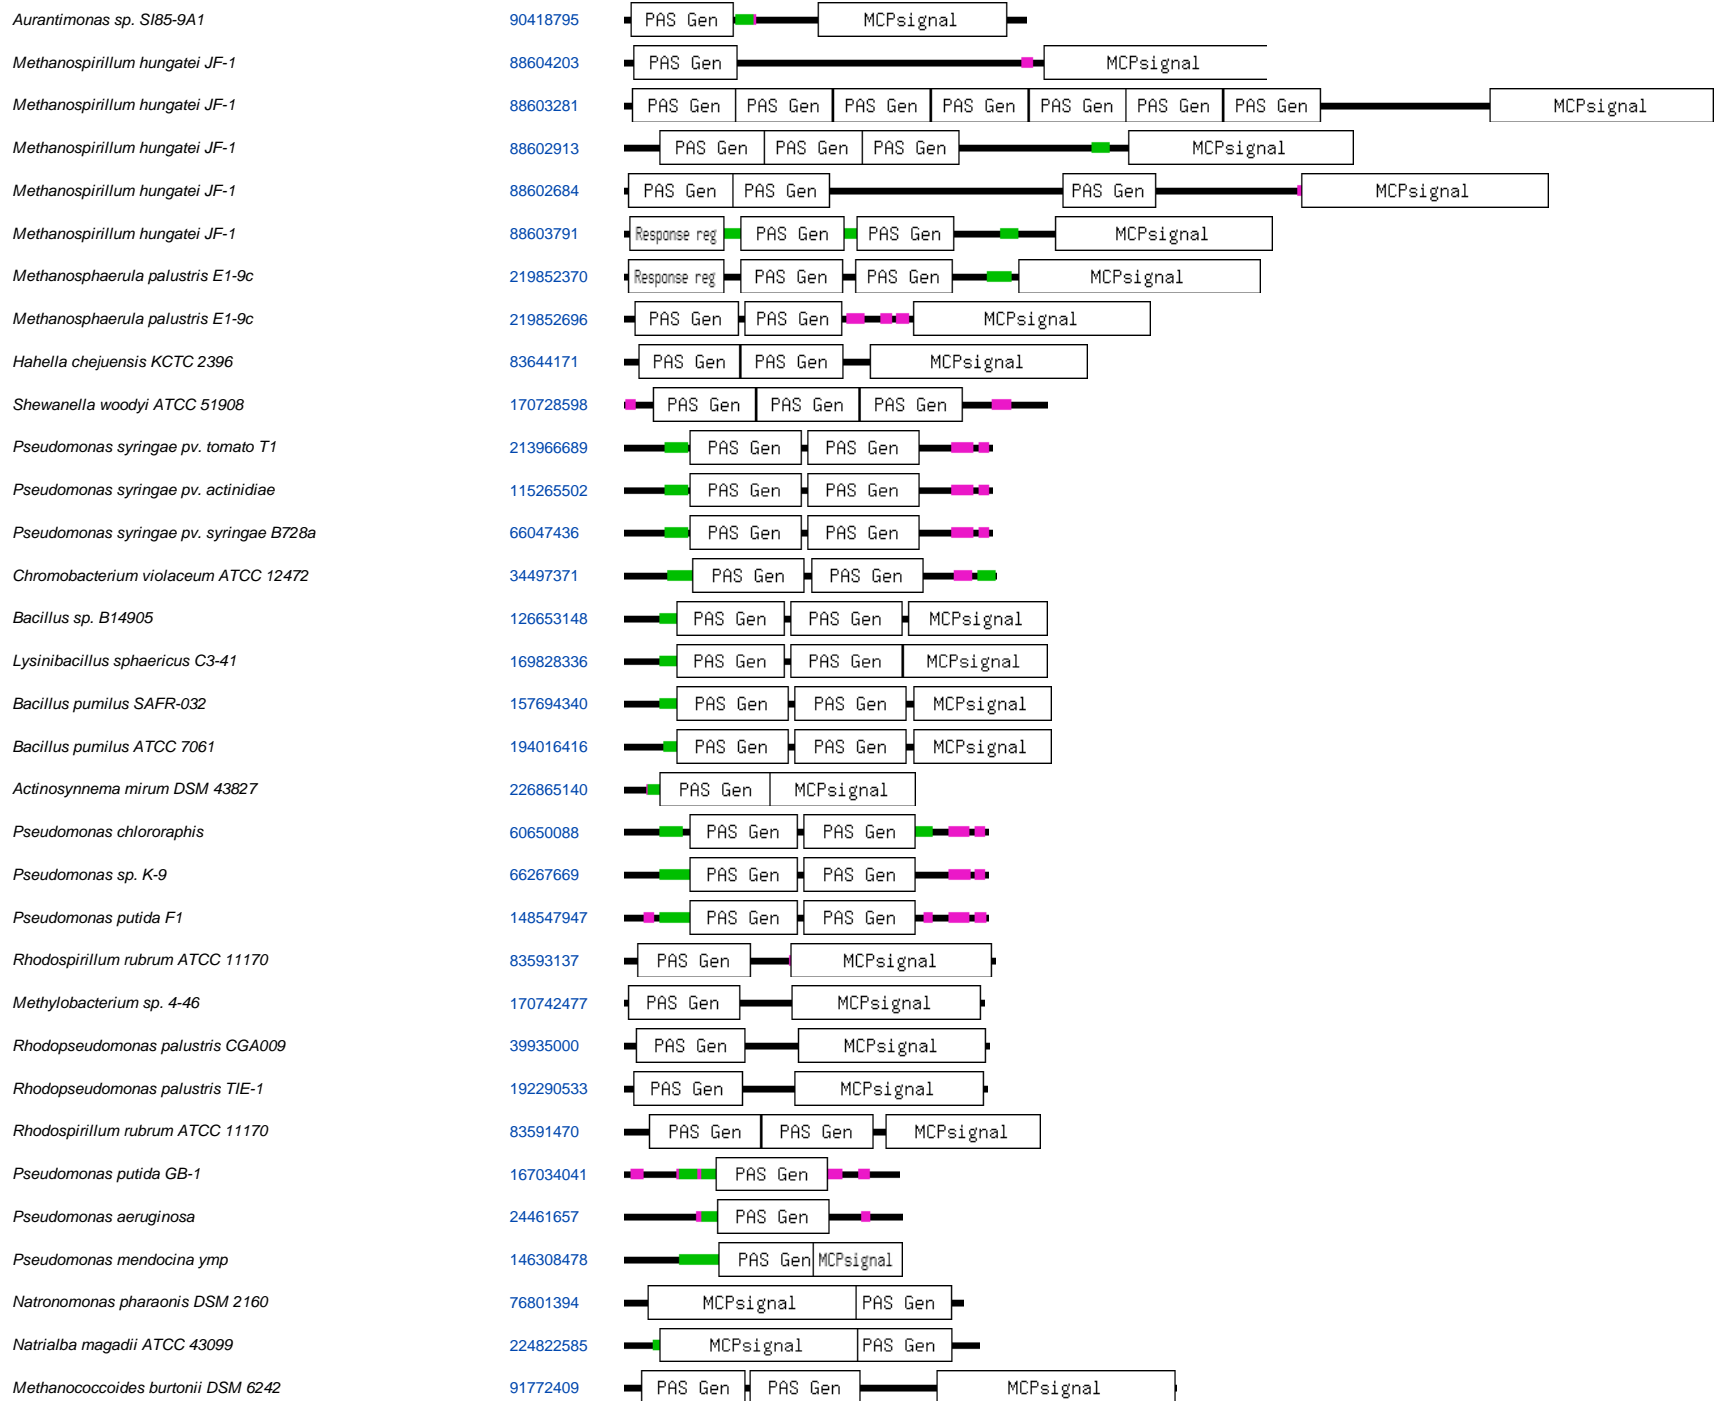

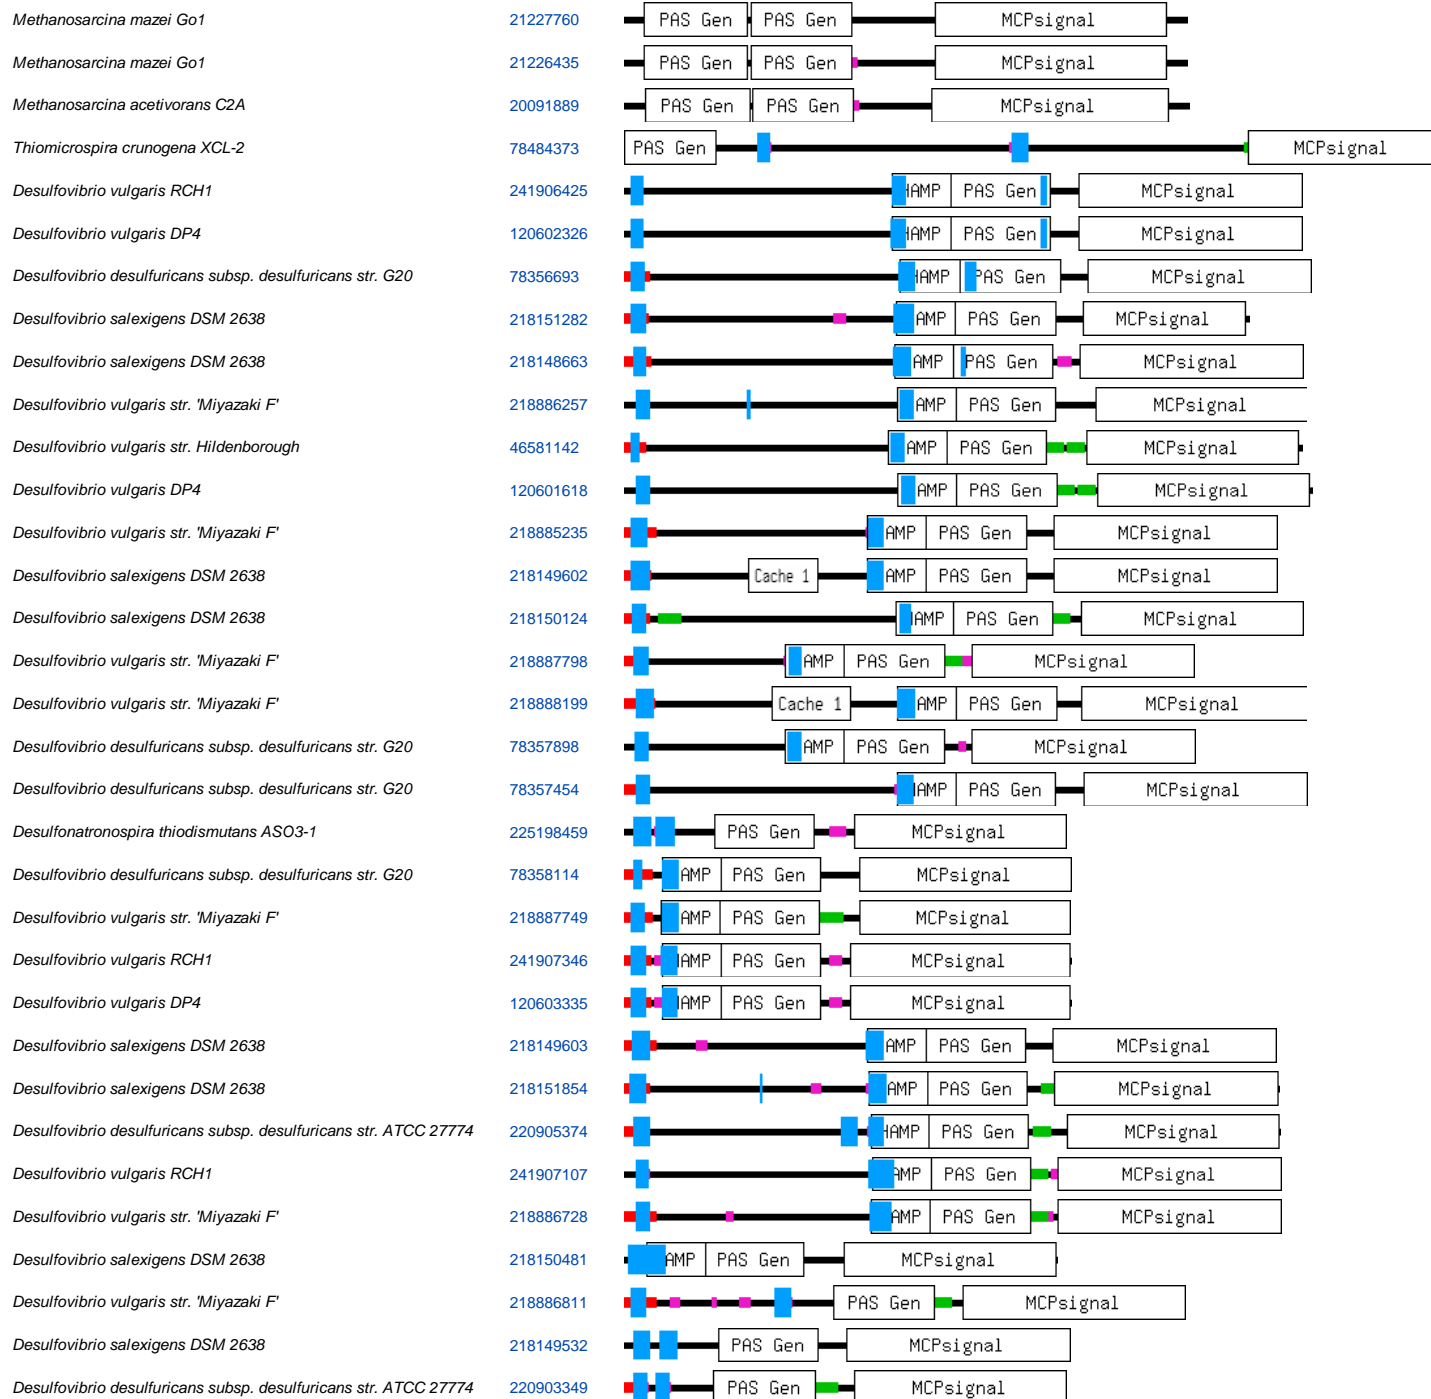

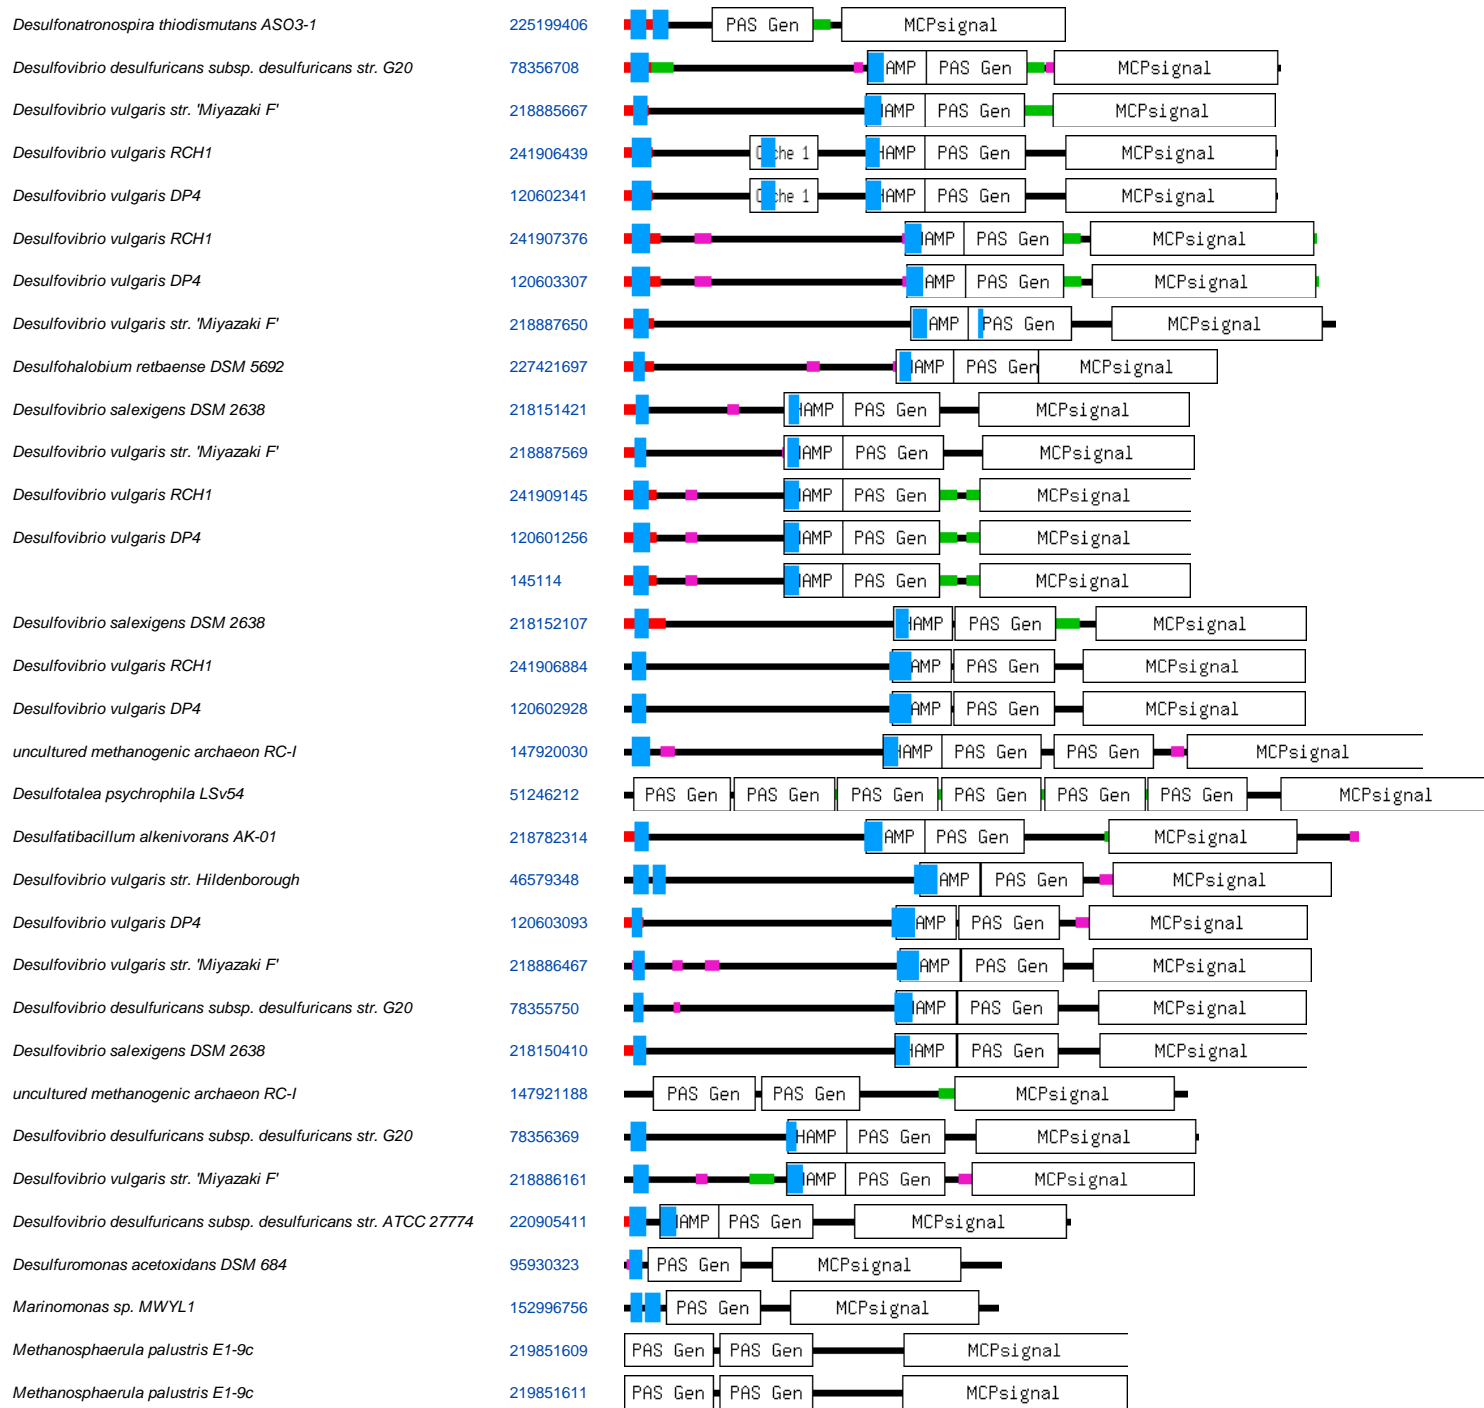

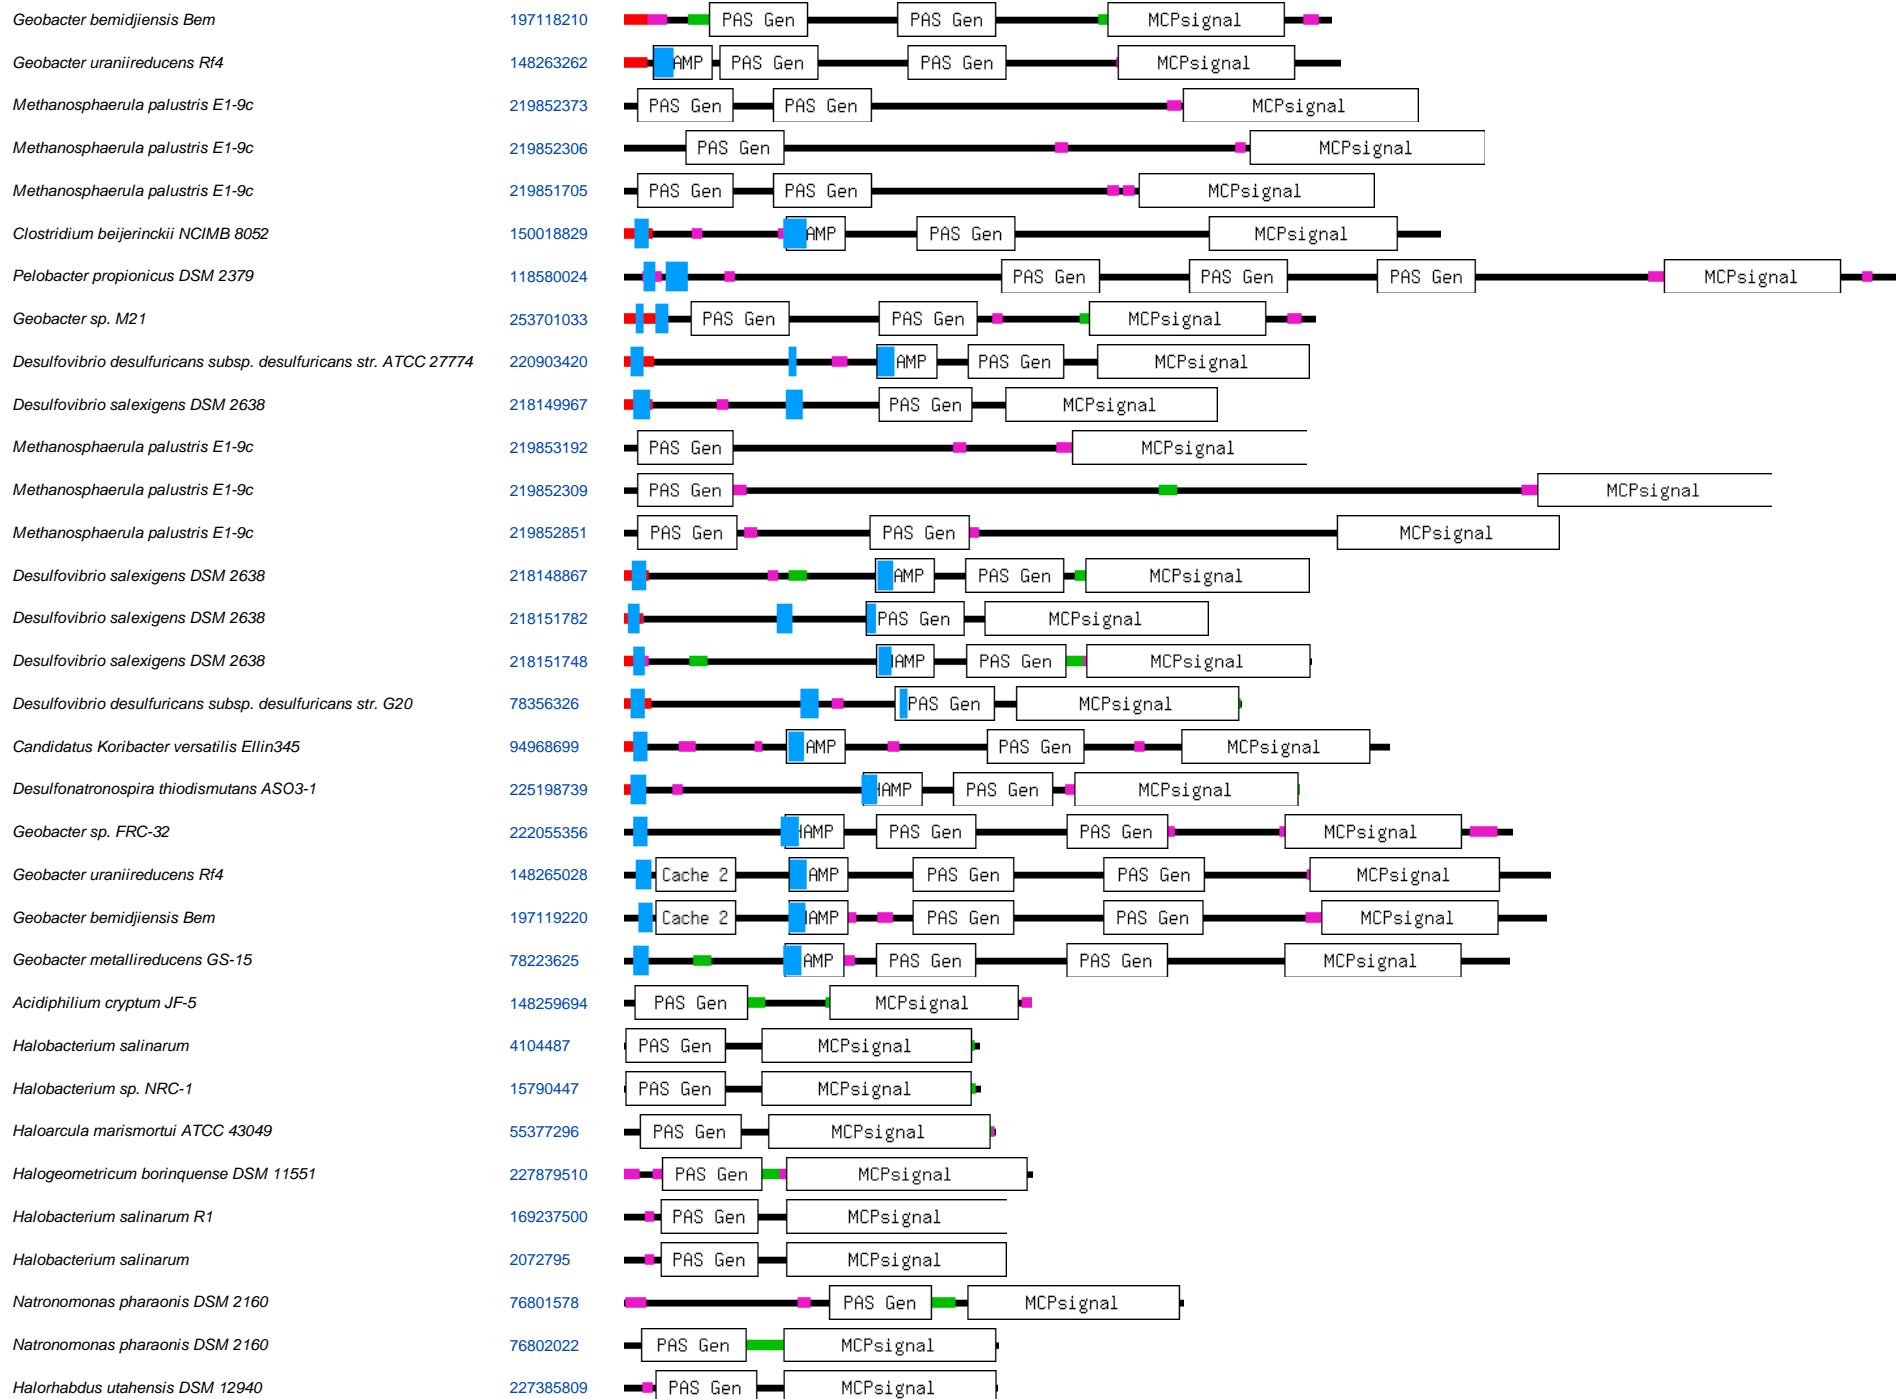

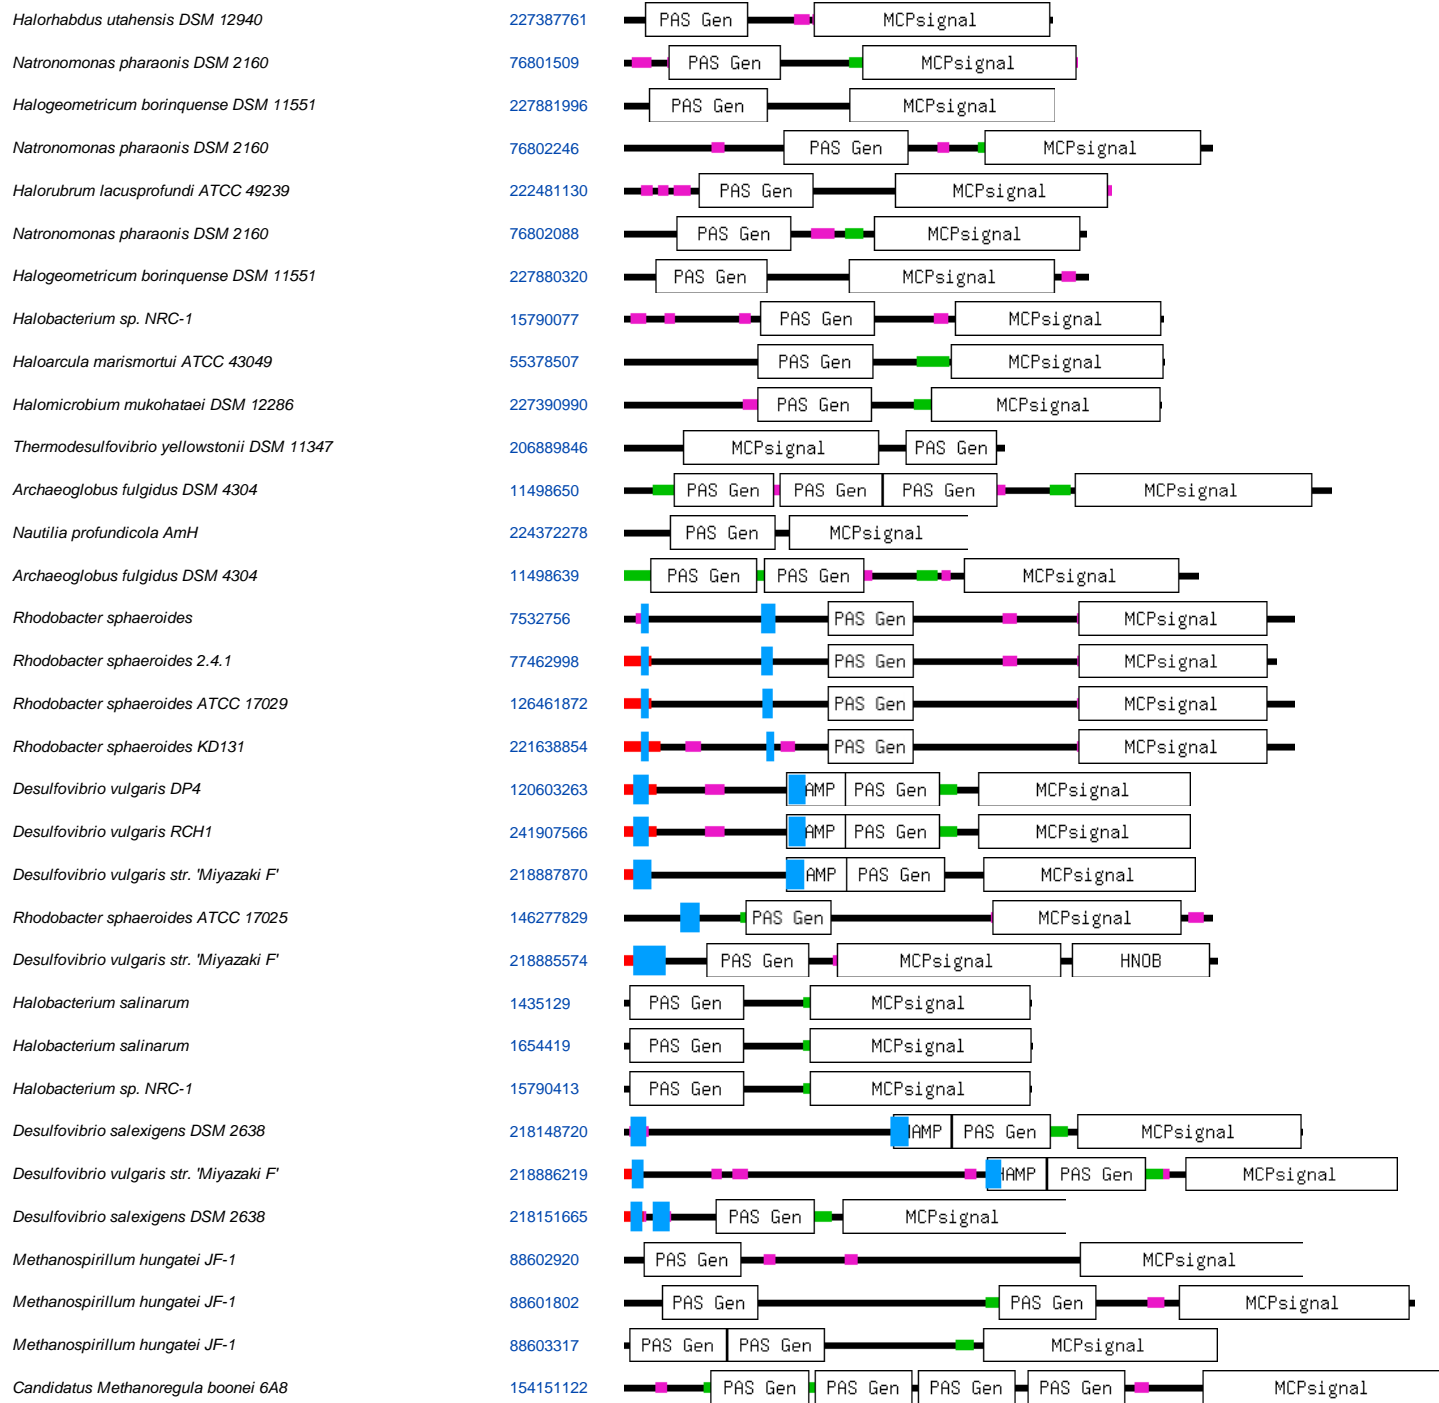

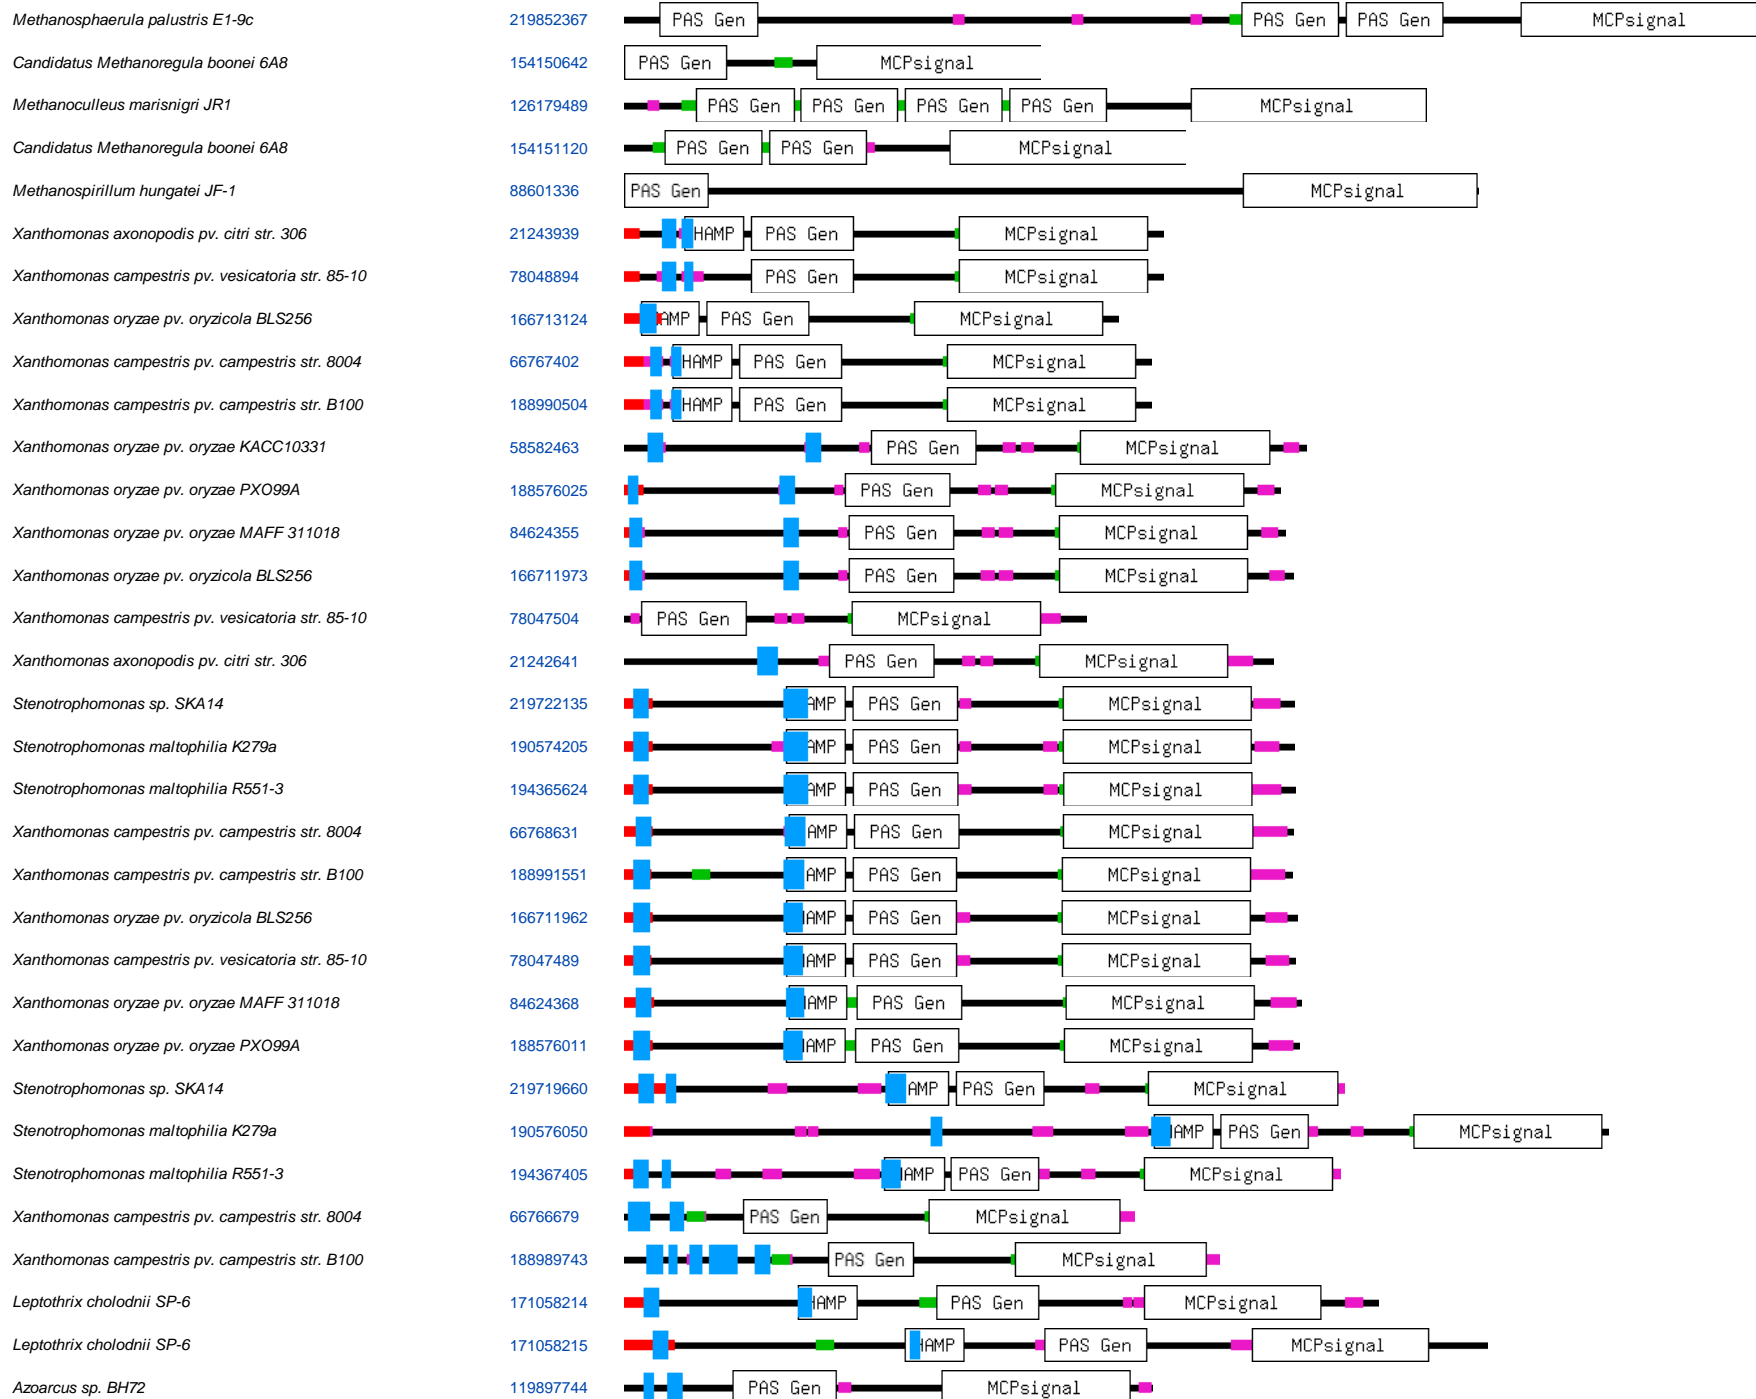

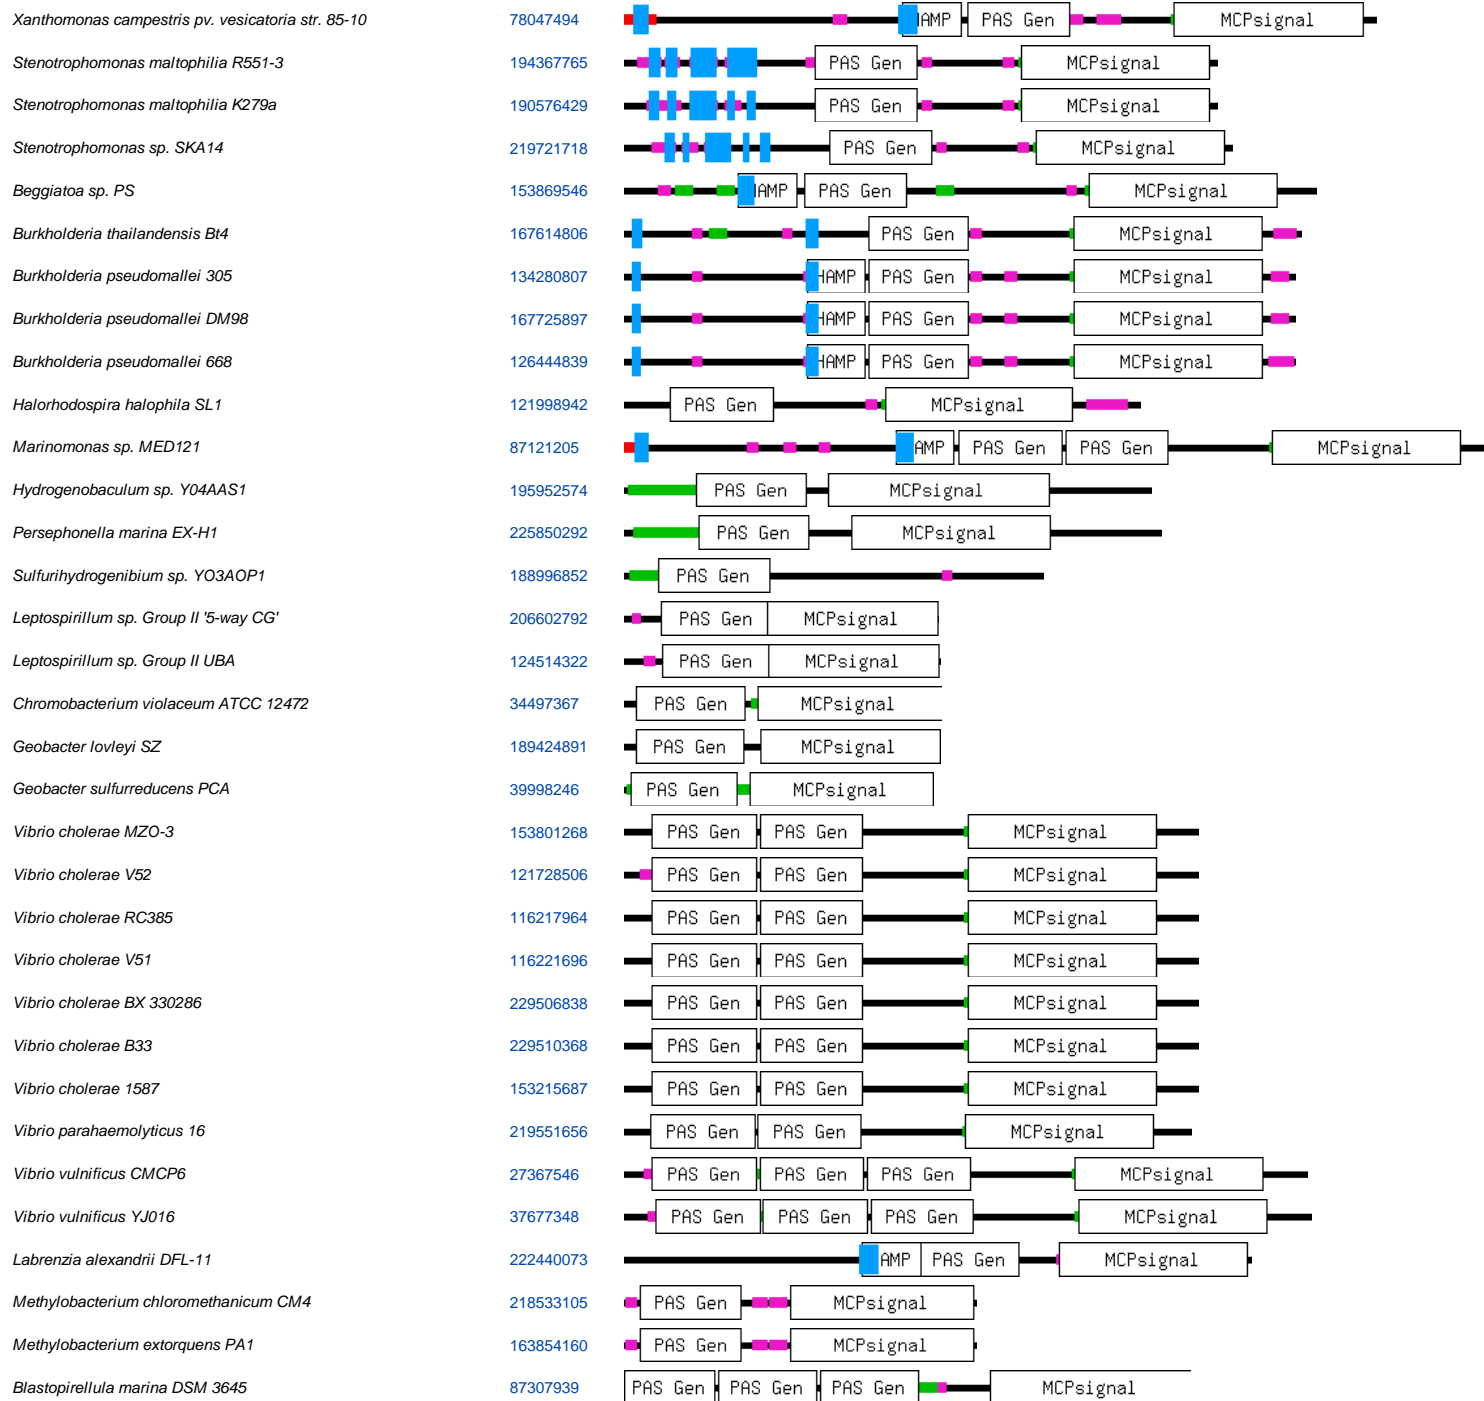



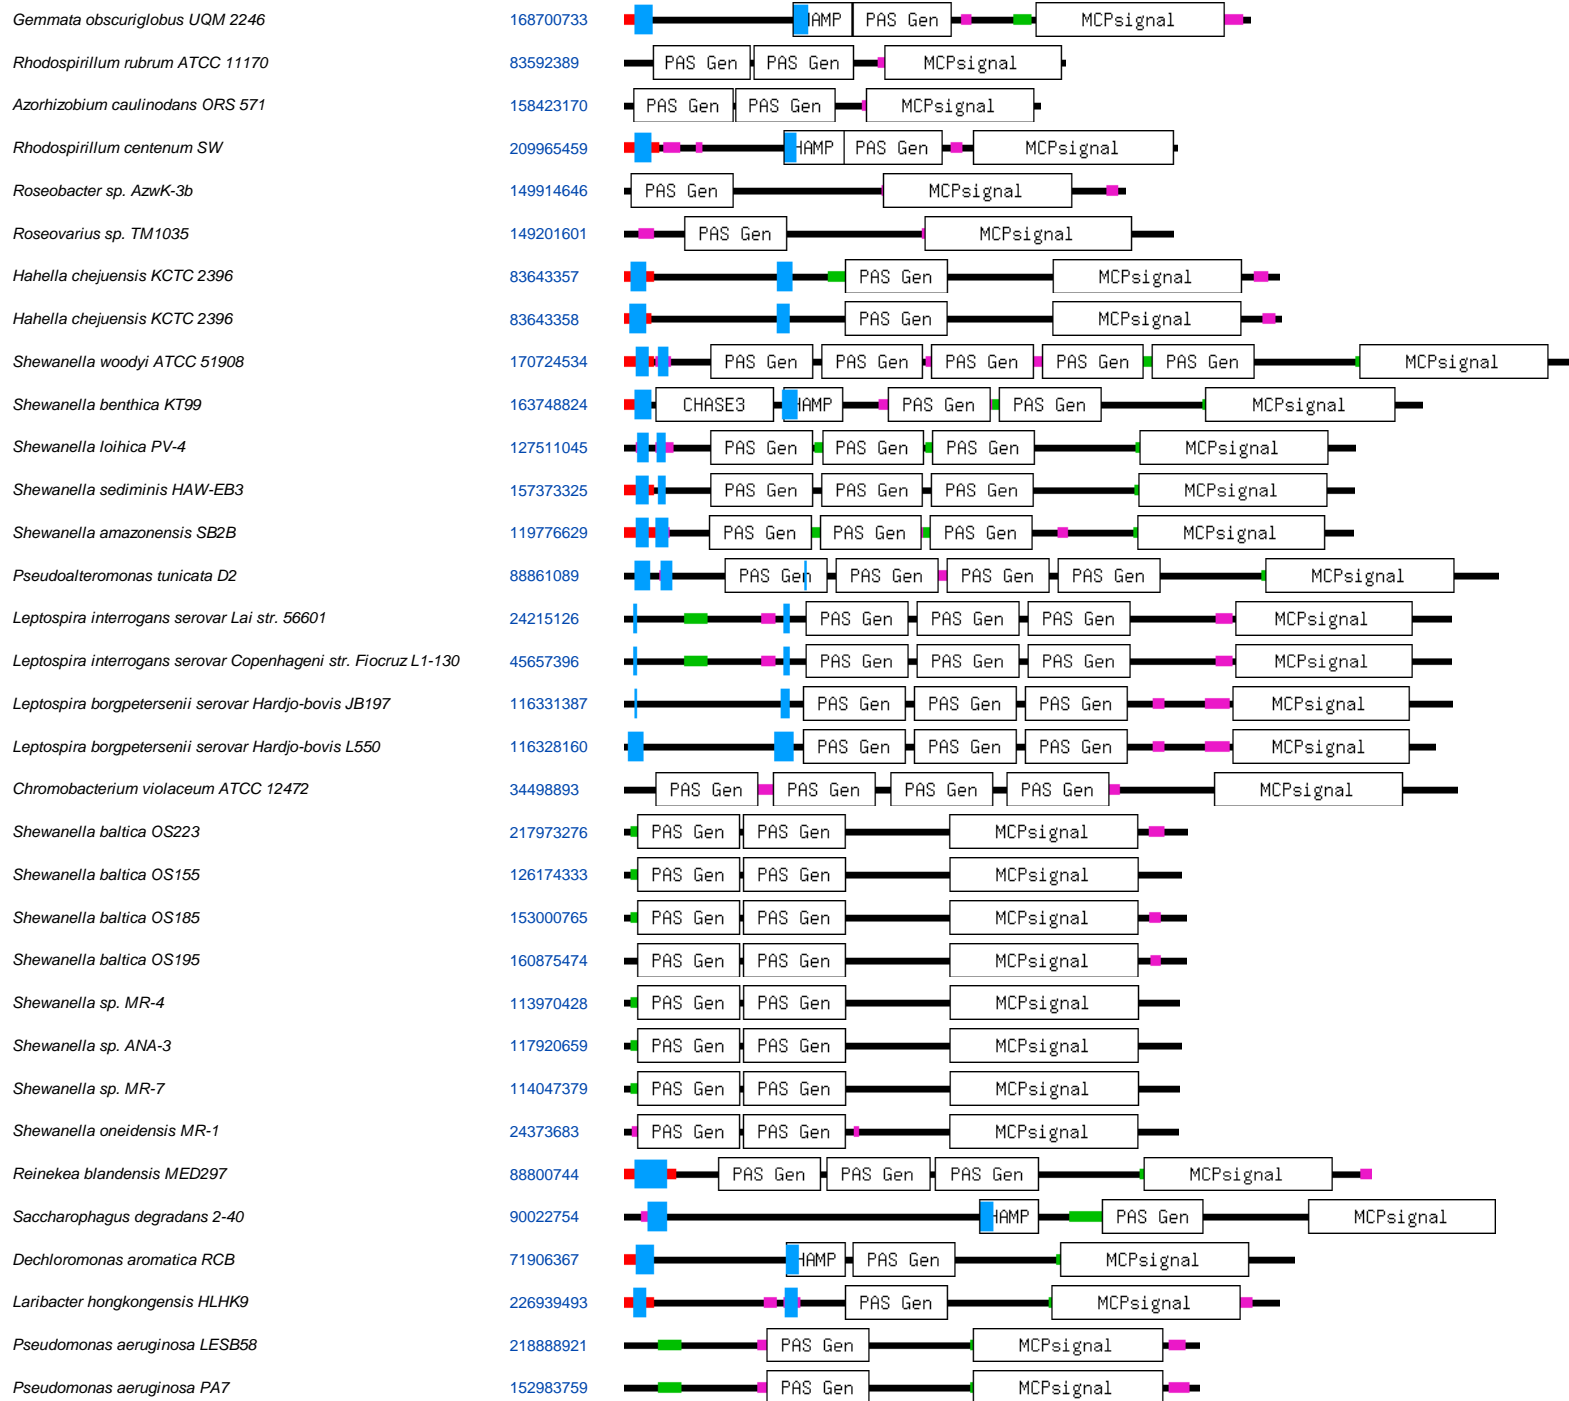

*Pseudomonas aeruginosa* UCBPP-PA14

116053897

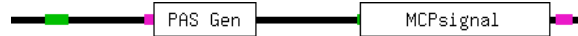

*Aeromonas hydrophila* subsp. *hydrophila* ATCC 7966

117618911

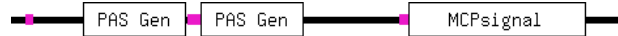

*Aeromonas salmonicida* subsp. *salmonicida* A449

145300164

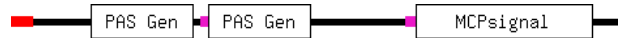

Supplement: 0910055107_sfig03.pdf [file 0910055107_sfig03.pdf]
